# Supplementary material
Source: PubMed Central journal article supplement (PMC3829604)
Supplement: NIHMS517021-supplement-01.pdf [file NIHMS517021-supplement-01.pdf]

**Supplementary Table 1: Number of patients with PD and number of controls according to series, country, and site**

| Series                 | Patients with PD |                    |                   |              | Controls        |                    |              |
|------------------------|------------------|--------------------|-------------------|--------------|-----------------|--------------------|--------------|
|                        | No. of patients  | Age                | Age at onset      | No. (%) Male | No. of controls | Age                | No. (%) Male |
| Caucasian series       | 5991             |                    |                   |              | 4331            |                    |              |
| Australia – Queensland | 923              | 72 ± 10 (38 - 106) | 59 ± 11 (23 - 96) | 570 (62%)    | 713             | 67 ± 10 (26 - 103) | 257 (36%)    |
| France – Lille         | 548              | 64 ± 10 (24 - 92)  | 55 ± 11 (24 - 86) | 300 (55%)    | 143             | 65 ± 11 (35 - 89)  | 64 (45%)     |
| Germany                |                  |                    |                   |              |                 |                    |              |
| Frankfurt              | 232              | 72 ± 11 (27 - 94)  | 56 ± 11 (26 - 79) | 119 (51%)    | 47              | 59 ± 10 (27 - 69)  | 30 (64%)     |
| Luebeck                | 512              | 62 ± 12 (22 - 95)  | 45±12 (18 - 80)   | 297 (58%)    | 289             | 55 ± 14 (21 - 96)  | 137 (47%)    |
| Tuebingen              | 330              | 53 ± 12 (18 - 81)  | NA                | 193 (58%)    | 339             | 53 ± 12 (27 - 72)  | 187 (55%)    |
| Greece                 |                  |                    |                   |              |                 |                    |              |
| Athens                 | 134              | 73 ± 10 (35 - 93)  | 66 ± 11 (34 - 88) | 78 (58%)     | 94              | 71 ± 10 (42 - 88)  | 42 (45%)     |
| Thessaly               | 316              | 70 ± 9 (38 - 89)   | 65 ± 9 (30 - 86)  | 158 (50%)    | 311             | 70 ± 9 (35 - 90)   | 157 (50%)    |
| Ireland – Dublin       | 360              | 67 ± 10 (37 - 94)  | 51 ± 10 (18 - 77) | 211 (59%)    | 444             | 67±24 (23 - 104)   | 159 (36%)    |
| Italy                  |                  |                    |                   |              |                 |                    |              |
| Mangone                | 185              | 72 ± 9 (44 - 98)   | 61 ± 9 (38 - 84)  | 100 (54%)    | 168             | 54 ± 9 (40 - 80)   | 77 (46%)     |
| Milan                  | 95               | 68 ± 9 (48 - 90)   | 62 ± 10 (37 - 90) | 50 (53%)     | 102             | 62 ± 7 (42 - 76)   | 63 (62%)     |
| Rome                   | 189              | 68 ± 8 (47 - 92)   | 58 ± 8 (45 - 85)  | 96 (51%)     | 95              | 69 ± 10 (44 - 91)  | 43 (45%)     |
| Norway - Trondheim     | 602              | 74 ± 11 (31 - 100) | 59 ± 11 (28 - 88) | 350 (58%)    | 526             | 71 ± 12 (44 - 107) | 293 (56%)    |
| Poland - Katowice      | 349              | 70 ± 11 (39 - 94)  | 57 ± 12 (25 - 81) | 218 (62%)    | 340             | 64 ± 16 (23 - 98)  | 157 (46%)    |
| Sweden – Stockholm     | 91               | 76 ± 9 (56 - 94)   | 66 ± 11 (39 - 90) | 51 (56%)     | 180             | 74 ± 10 (53 - 96)  | 79 (44%)     |
| United States          |                  |                    |                   |              |                 |                    |              |
| Jacksonville, FL       | 377              | 71 ± 11 (35 - 91)  | 62 ± 12 (28 - 83) | 209 (55%)    | 364             | 73 ± 11 (34 - 93)  | 189 (52%)    |
| Rochester, MN          | 748              | 68 ± 9 (32 - 98)   | 64 ± 9 (23 - 88)  | 453 (61%)    | 176             | 60 ± 6 (43 - 77)   | 111 (63%)    |
| Asian series           | 1351             |                    |                   |              | 938             |                    |              |
| Japan – Tokyo          | 171              | 49±13 (22 - 88)    | 40±11 (21 - 80)   | 92 (54%)     | 90              | 57±16 (23 - 89)    | 42 (47%)     |
| Korea                  |                  |                    |                   |              |                 |                    |              |
| Anyang Hallym          | 150              | 61±14 (20 - 89)    | 59±14 (20 - 89)   | 78 (52%)     | 144             | 52±6 (42 - 72)     | 16 (11%)     |
| Seoul                  | 661              | 65±9 (33 - 91)     | 55±9 (23 - 85)    | 292 (44%)    | 406             | 63±9 (37 - 85)     | 174 (43%)    |
| Taiwan – Taipei        | 369              | NA                 | 58±11 (26 - 83)   | 210 (57%)    | 298             | NA                 | 90 (30%)     |

The sample median ± SD (minimum – maximum) is given for age and age at onset. Information was unavailable regarding age in the Caucasian series for 147 patients with PD (105 Luebeck, 39 Tuebingen, 1 Athens, 1 Trondheim, 1 Rochester) and 21 controls (12 Luebeck, 4 Tuebingen, 2 Milan, 2 Katowice, 1 Rochester). Information was unavailable regarding age in the Asian series for 371 patients with PD (2 Tokyo, 369 Taipei) and 298 controls (298 Taipei). Information was unavailable regarding age at onset for 723 patients in the Caucasian series (10 Queensland, 15 Frankfurt, 147 Luebeck, 330 Tuebingen, 2 Athens, 109 Dublin, 1 Rome, 90 Trondheim, 5 Katowice, 2 Stockholm, 4 Jacksonville, 8 Rochester) and 8 patients in the Asian series (8 Taipei).

**Supplementary Table 2: Primer sequences**

| Gene         | rs Number  | PCR Primer Forward             | PCR Primer Reverse             | Extend Primer               |
|--------------|------------|--------------------------------|--------------------------------|-----------------------------|
| <i>SNCA</i>  | rs181489   | ACGTTGGATGCTCTATTTTAGAATACAAAC | ACGTTGGATGCTGTAAGTGGAAAGTTATAG | TATAGATATTATCAAAGAACCAAGAA  |
| <i>SNCA</i>  | rs356219   | ACGTTGGATGCATGGGTATACTGGTGGTTC | ACGTTGGATGATGTATAAGAAAACAAACAC | ataatAAAACAAACACAAAATTCCA   |
| <i>SNCA</i>  | rs11931074 | ACGTTGGATGACAGTCAAATGGCAGCCTTC | ACGTTGGATGTCTTCCTCGGAAGAGATACC | AATTGTGAATATGTCTTTGACTG     |
| <i>SNCA</i>  | rs2583988  | ACGTTGGATGACAACAGACCAATGTGAGAG | ACGTTGGATGGTTTGAATCATGTTAAACG  | gaagCATGTTAAACGTTTATAAGAAGT |
| <i>LRRK2</i> | rs7133914  | ACGTTGGATGGGATTCTGCCTGTCGTTG   | ACGTTGGATGTCGCTGCGTCATAAAATGGG | ttcTGAGTACTATAGAATTCCTCA    |

Supplementary Table 3a: Genotype counts and frequencies for each series

| Variant/Series         | Minor allele count, % | Major allele count, % | Minor-Minor genotype count, % | Heterozygous count, % | Major-Major count, % |
|------------------------|-----------------------|-----------------------|-------------------------------|-----------------------|----------------------|
| <i>SNCA</i> rs181489   |                       |                       |                               |                       |                      |
| Asian patients         | T: 6 (0.2%)           | C: 2650 (99.8%)       | 0 (0.0%)                      | 6 (0.5%)              | 1322 (99.5%)         |
| Asian controls         | T: 1 (0.1%)           | C: 1613 (99.9%)       | 0 (0.0%)                      | 1 (0.1%)              | 806 (99.9%)          |
| Caucasian patients     | T: 4010 (34.7%)       | C: 7546 (65.3%)       | 743 (12.9%)                   | 2524 (43.7%)          | 2511 (43.5%)         |
| Caucasian controls     | T: 2468 (29.7%)       | C: 5832 (70.3%)       | 369 (8.9%)                    | 1730 (41.7%)          | 2051 (49.4%)         |
| <i>SNCA</i> rs356219   |                       |                       |                               |                       |                      |
| Asian patients         | A: 957 (36.6%)        | G: 1655 (63.4%)       | 169 (12.9%)                   | 619 (47.4%)           | 518 (39.7%)          |
| Asian controls         | A: 826 (46.4%)        | G: 956 (53.6%)        | 198 (22.2%)                   | 430 (48.3%)           | 263 (29.5%)          |
| Caucasian patients     | G: 5007 (42.6%)       | A: 6735 (57.4%)       | 1084 (18.5%)                  | 2839 (48.4%)          | 1948 (33.2%)         |
| Caucasian controls     | G: 3273 (38.4%)       | A: 5259 (61.6%)       | 630 (14.8%)                   | 2013 (47.2%)          | 1623 (38.0%)         |
| <i>SNCA</i> rs11931074 |                       |                       |                               |                       |                      |
| Asian patients         | G: 1012 (37.6%)       | T: 1678 (62.4%)       | 184 (13.7%)                   | 644 (47.9%)           | 517 (38.4%)          |
| Asian controls         | G: 868 (46.5%)        | T: 998 (53.5%)        | 208 (22.3%)                   | 452 (48.4%)           | 273 (29.3%)          |
| Caucasian patients     | T: 1089 (9.1%)        | G: 10815 (90.9%)      | 48 (0.8%)                     | 993 (16.7%)           | 4911 (82.5%)         |
| Caucasian controls     | T: 610 (7.1%)         | G: 7992 (92.9%)       | 25 (0.6%)                     | 560 (13.0%)           | 3716 (86.4%)         |
| <i>SNCA</i> rs2583988  |                       |                       |                               |                       |                      |
| Asian patients         | T: 0 (0.0%)           | C: 2660 (100.0%)      | 0 (0.0%)                      | 0 (0.0%)              | 1330 (100.0%)        |
| Asian controls         | T: 1 (0.1%)           | C: 1851 (99.9%)       | 0 (0.0%)                      | 1 (0.1%)              | 925 (99.9%)          |
| Caucasian patients     | T: 3620 (30.5%)       | C: 8234 (69.5%)       | 593 (10.0%)                   | 2434 (41.1%)          | 2900 (48.9%)         |
| Caucasian controls     | T: 2270 (26.5%)       | C: 6304 (73.5%)       | 333 (7.8%)                    | 1604 (37.4%)          | 2350 (54.8%)         |
| <i>LRRK2</i> p.R1398H  |                       |                       |                               |                       |                      |
| Asian patients         | A: 284 (10.6%)        | G: 2406 (89.4%)       | 23 (1.7%)                     | 238 (17.7%)           | 1084 (80.6%)         |
| Asian controls         | A: 239 (12.8%)        | G: 1623 (87.2%)       | 9 (1.0%)                      | 221 (23.7%)           | 701 (75.3%)          |
| Caucasian patients     | A: 742 (6.3%)         | G: 11046 (93.7%)      | 30 (0.5%)                     | 682 (11.6%)           | 5182 (87.9%)         |
| Caucasian controls     | A: 617 (7.2%)         | G: 7947 (92.8%)       | 15 (0.4%)                     | 587 (13.7%)           | 3680 (85.9%)         |
| <i>MAPT</i> rs1052553  |                       |                       |                               |                       |                      |
| Asian patients         | G: 5 (0.2%)           | A: 2615 (99.8%)       | 0 (0.0%)                      | 5 (0.4%)              | 1305 (99.6%)         |
| Asian controls         | G: 0 (0.0%)           | A: 1852 (100%)        | 0 (0.0%)                      | 0 (0.0%)              | 926 (100.0%)         |
| Caucasian patients     | G: 2111 (17.6%)       | A: 9871 (82.4%)       | 218 (3.6%)                    | 1675 (28.0%)          | 4098 (68.4%)         |
| Caucasian controls     | G: 1794 (20.7%)       | A: 6868 (79.3%)       | 211 (4.9%)                    | 1372 (31.7%)          | 2748 (63.4%)         |

Supplementary Table 3b: Genotype counts and frequencies for SNCA rs181489 for each site

| Series    | Country/Site                     | Disease group | Minor allele count, % | Major allele count, % | Minor-Minor count, % | Heterozygous count, % | Major-Major count, % |
|-----------|----------------------------------|---------------|-----------------------|-----------------------|----------------------|-----------------------|----------------------|
| Caucasian | Australia – Queensland           | PD            | T: 593 (33.1%)        | C: 1197 (66.9%)       | 98 (10.9%)           | 397 (44.4%)           | 400 (44.7%)          |
| Caucasian | Australia – Queensland           | Controls      | T: 423 (30.9%)        | C: 947 (69.1%)        | 58 (8.5%)            | 307 (44.8%)           | 320 (46.7%)          |
| Caucasian | France – Lille                   | PD            | T: 352 (33.1%)        | C: 710 (66.9%)        | 57 (10.7%)           | 238 (44.8%)           | 236 (44.4%)          |
| Caucasian | France – Lille                   | Controls      | T: 83 (30.3%)         | C: 191 (69.7%)        | 11 (8.0%)            | 61 (44.5%)            | 65 (47.4%)           |
| Caucasian | Germany – Frankfurt              | PD            | T: 157 (35.0%)        | C: 291 (65.0%)        | 19 (8.5%)            | 119 (53.1%)           | 86 (38.4%)           |
| Caucasian | Germany – Frankfurt              | Controls      | T: 32 (39.0%)         | C: 50 (61.0%)         | 7 (17.1%)            | 18 (43.9%)            | 16 (39.0%)           |
| Caucasian | Germany – Luebeck                | PD            | T: 344 (36.4%)        | C: 602 (63.6%)        | 85 (18.0%)           | 174 (36.8%)           | 214 (45.2%)          |
| Caucasian | Germany – Luebeck                | Controls      | T: 157 (29.6%)        | C: 373 (70.4%)        | 25 (9.4%)            | 107 (40.4%)           | 133 (50.2%)          |
| Caucasian | Germany – Tuebingen              | PD            | T: 223 (34.1%)        | C: 431 (65.9%)        | 39 (11.9%)           | 145 (44.3%)           | 143 (43.7%)          |
| Caucasian | Germany – Tuebingen              | Controls      | T: 198 (29.3%)        | C: 478 (70.7%)        | 29 (8.6%)            | 140 (41.4%)           | 169 (50.0%)          |
| Caucasian | Greece – Athens                  | PD            | T: 100 (39.4%)        | C: 154 (60.6%)        | 17 (13.4%)           | 66 (52.0%)            | 44 (34.6%)           |
| Caucasian | Greece – Athens                  | Controls      | T: 57 (31.7%)         | C: 123 (68.3%)        | 10 (11.1%)           | 37 (41.1%)            | 43 (47.8%)           |
| Caucasian | Greece – Thessaly                | PD            | T: 215 (37.5%)        | C: 359 (62.5%)        | 46 (16.0%)           | 123 (42.9%)           | 118 (41.1%)          |
| Caucasian | Greece – Thessaly                | Controls      | T: 156 (29.2%)        | C: 378 (70.8%)        | 17 (6.4%)            | 122 (45.7%)           | 128 (47.9%)          |
| Caucasian | Ireland – Dublin                 | PD            | T: 262 (38.1%)        | C: 426 (61.9%)        | 58 (16.9%)           | 146 (42.4%)           | 140 (40.7%)          |
| Caucasian | Ireland – Dublin                 | Controls      | T: 232 (27.4%)        | C: 614 (72.6%)        | 38 (9.0%)            | 156 (36.9%)           | 229 (54.1%)          |
| Caucasian | Italy – Mangone                  | PD            | T: 125 (34.7%)        | C: 235 (65.3%)        | 20 (11.1%)           | 85 (47.2%)            | 75 (41.7%)           |
| Caucasian | Italy – Mangone                  | Controls      | T: 89 (26.6%)         | C: 245 (73.4%)        | 9 (5.4%)             | 71 (42.5%)            | 87 (52.1%)           |
| Caucasian | Italy – Milan                    | PD            | T: 61 (37.2%)         | C: 103 (62.8%)        | 8 (9.8%)             | 45 (54.9%)            | 29 (35.4%)           |
| Caucasian | Italy – Milan                    | Controls      | T: 39 (27.5%)         | C: 103 (72.5%)        | 9 (12.7%)            | 21 (29.6%)            | 41 (57.7%)           |
| Caucasian | Italy – Rome                     | PD            | T: 144 (38.1%)        | C: 234 (61.9%)        | 28 (14.8%)           | 88 (46.6%)            | 73 (38.6%)           |
| Caucasian | Italy – Rome                     | Controls      | T: 59 (31.1%)         | C: 131 (68.9%)        | 8 (8.4%)             | 43 (45.3%)            | 44 (46.3%)           |
| Caucasian | Norway – Trondheim               | PD            | T: 392 (32.6%)        | C: 812 (67.4%)        | 80 (13.3%)           | 232 (38.5%)           | 290 (48.2%)          |
| Caucasian | Norway – Trondheim               | Controls      | T: 340 (32.4%)        | C: 708 (67.6%)        | 56 (10.7%)           | 228 (43.5%)           | 240 (45.8%)          |
| Caucasian | Poland – Katowice                | PD            | T: 238 (34.1%)        | C: 460 (65.9%)        | 47 (13.5%)           | 144 (41.3%)           | 158 (45.3%)          |
| Caucasian | Poland – Katowice                | Controls      | T: 195 (29.0%)        | C: 477 (71.0%)        | 30 (8.9%)            | 135 (40.2%)           | 171 (50.9%)          |
| Caucasian | Sweden – Stockholm               | PD            | T: 50 (27.8%)         | C: 130 (72.2%)        | 10 (11.1%)           | 30 (33.3%)            | 50 (55.6%)           |
| Caucasian | Sweden – Stockholm               | Controls      | T: 102 (29.0%)        | C: 250 (71.0%)        | 17 (9.7%)            | 68 (38.6%)            | 91 (51.7%)           |
| Caucasian | United States - Jacksonville, FL | PD            | T: 270 (36.0%)        | C: 480 (64.0%)        | 50 (13.3%)           | 170 (45.3%)           | 155 (41.3%)          |
| Caucasian | United States - Jacksonville, FL | Controls      | T: 201 (27.9%)        | C: 519 (72.1%)        | 32 (8.9%)            | 137 (38.1%)           | 191 (53.1%)          |
| Caucasian | United States - Rochester, MN    | PD            | T: 484 (34.4%)        | C: 922 (65.6%)        | 81 (11.5%)           | 322 (45.8%)           | 300 (42.7%)          |
| Caucasian | United States - Rochester, MN    | Controls      | T: 105 (30.0%)        | C: 245 (70.0%)        | 13 (7.4%)            | 79 (45.1%)            | 83 (47.4%)           |
| Asian     | Japan – Tokyo                    | PD            | T: 0 (0.0%)           | C: 338 (100.0%)       | 0 (0.0%)             | 0 (0.0%)              | 169 (100.0%)         |
| Asian     | Japan – Tokyo                    | Controls      | T: 0 (0.0%)           | C: 166 (100.0%)       | 0 (0.0%)             | 0 (0.0%)              | 83 (100.0%)          |
| Asian     | Korea - Anyang Hallym            | PD            | T: 3 (1.1%)           | C: 281 (98.9%)        | 0 (0.0%)             | 3 (2.1%)              | 139 (97.9%)          |
| Asian     | Korea - Anyang Hallym            | Controls      | T: 1 (0.4%)           | C: 279 (99.6%)        | 0 (0.0%)             | 1 (0.7%)              | 139 (99.3%)          |
| Asian     | Korea - Seoul – Cases            | PD            | T: 0 (0.0%)           | C: 1300 (100.0%)      | 0 (0.0%)             | 0 (0.0%)              | 650 (100.0%)         |
| Asian     | Korea - Seoul - Controls         | Controls      | T: 0 (0.0%)           | C: 794 (100.0%)       | 0 (0.0%)             | 0 (0.0%)              | 397 (100.0%)         |
| Asian     | Taiwan - Taipei - Cases          | PD            | T: 3 (0.4%)           | C: 731 (99.6%)        | 0 (0.0%)             | 3 (0.8%)              | 364 (99.2%)          |
| Asian     | Taiwan - Taipei - Controls       | Controls      | T: 0 (0.0%)           | C: 374 (100.0%)       | 0 (0.0%)             | 0 (0.0%)              | 187 (100.0%)         |

Supplementary Table 3c: Genotype counts and frequencies for SNCA rs356219 for each site

| Series    | Country/Site                     | Disease group | Minor allele count, % | Major allele count, % | Minor-Minor genotype count, % | Heterozygous count, % | Major-Major count, % |
|-----------|----------------------------------|---------------|-----------------------|-----------------------|-------------------------------|-----------------------|----------------------|
| Caucasian | Australia – Queensland           | PD            | G: 749 (41.4%)        | A: 1059 (58.6%)       | 147 (16.3%)                   | 455 (50.3%)           | 302 (33.4%)          |
| Caucasian | Australia – Queensland           | Controls      | G: 541 (39.0%)        | A: 847 (61.0%)        | 102 (14.7%)                   | 337 (48.6%)           | 255 (36.7%)          |
| Caucasian | France – Lille                   | PD            | G: 461 (42.1%)        | A: 633 (57.9%)        | 93 (17.0%)                    | 275 (50.3%)           | 179 (32.7%)          |
| Caucasian | France – Lille                   | Controls      | G: 110 (39.0%)        | A: 172 (61.0%)        | 20 (14.2%)                    | 70 (49.6%)            | 51 (36.2%)           |
| Caucasian | Germany – Frankfurt              | PD            | G: 200 (43.5%)        | A: 260 (56.5%)        | 36 (15.7%)                    | 128 (55.7%)           | 66 (28.7%)           |
| Caucasian | Germany – Frankfurt              | Controls      | G: 35 (39.8%)         | A: 53 (60.2%)         | 7 (15.9%)                     | 21 (47.7%)            | 16 (36.4%)           |
| Caucasian | Germany – Luebeck                | PD            | G: 453 (45.0%)        | A: 553 (55.0%)        | 110 (21.9%)                   | 233 (46.3%)           | 160 (31.8%)          |
| Caucasian | Germany – Luebeck                | Controls      | G: 212 (36.8%)        | A: 364 (63.2%)        | 38 (13.2%)                    | 136 (47.2%)           | 114 (39.6%)          |
| Caucasian | Germany – Tuebingen              | PD            | G: 288 (43.8%)        | A: 370 (56.2%)        | 69 (21.0%)                    | 150 (45.6%)           | 110 (33.4%)          |
| Caucasian | Germany – Tuebingen              | Controls      | G: 238 (35.1%)        | A: 440 (64.9%)        | 41 (12.1%)                    | 156 (46.0%)           | 142 (41.9%)          |
| Caucasian | Greece – Athens                  | PD            | G: 123 (46.6%)        | A: 141 (53.4%)        | 28 (21.2%)                    | 67 (50.8%)            | 37 (28.0%)           |
| Caucasian | Greece – Athens                  | Controls      | G: 73 (41.0%)         | A: 105 (59.0%)        | 18 (20.2%)                    | 37 (41.6%)            | 34 (38.2%)           |
| Caucasian | Greece – Thessaly                | PD            | G: 260 (41.8%)        | A: 362 (58.2%)        | 61 (19.6%)                    | 138 (44.4%)           | 112 (36.0%)          |
| Caucasian | Greece – Thessaly                | Controls      | G: 230 (37.1%)        | A: 390 (62.9%)        | 36 (11.6%)                    | 158 (51.0%)           | 116 (37.4%)          |
| Caucasian | Ireland – Dublin                 | PD            | G: 331 (47.0%)        | A: 373 (53.0%)        | 76 (21.6%)                    | 179 (50.9%)           | 97 (27.5%)           |
| Caucasian | Ireland – Dublin                 | Controls      | G: 406 (47.5%)        | A: 448 (52.5%)        | 106 (24.8%)                   | 194 (45.4%)           | 127 (29.7%)          |
| Caucasian | Italy – Mangone                  | PD            | G: 150 (41.0%)        | A: 216 (59.0%)        | 27 (14.8%)                    | 96 (52.5%)            | 60 (32.8%)           |
| Caucasian | Italy – Mangone                  | Controls      | G: 113 (34.0%)        | A: 219 (66.0%)        | 22 (13.3%)                    | 69 (41.6%)            | 75 (45.2%)           |
| Caucasian | Italy – Milan                    | PD            | G: 86 (46.7%)         | A: 98 (53.3%)         | 20 (21.7%)                    | 46 (50.0%)            | 26 (28.3%)           |
| Caucasian | Italy – Milan                    | Controls      | G: 70 (34.7%)         | A: 132 (65.3%)        | 14 (13.9%)                    | 42 (41.6%)            | 45 (44.6%)           |
| Caucasian | Italy – Rome                     | PD            | G: 166 (45.1%)        | A: 202 (54.9%)        | 38 (20.7%)                    | 90 (48.9%)            | 56 (30.4%)           |
| Caucasian | Italy – Rome                     | Controls      | G: 65 (35.3%)         | A: 119 (64.7%)        | 10 (10.9%)                    | 45 (48.9%)            | 37 (40.2%)           |
| Caucasian | Norway – Trondheim               | PD            | G: 526 (43.8%)        | A: 674 (56.2%)        | 124 (20.7%)                   | 278 (46.3%)           | 198 (33.0%)          |
| Caucasian | Norway – Trondheim               | Controls      | G: 430 (40.9%)        | A: 622 (59.1%)        | 84 (16.0%)                    | 262 (49.8%)           | 180 (34.2%)          |
| Caucasian | Poland - Katowice                | PD            | G: 278 (40.8%)        | A: 404 (59.2%)        | 64 (18.8%)                    | 150 (44.0%)           | 127 (37.2%)          |
| Caucasian | Poland - Katowice                | Controls      | G: 242 (35.8%)        | A: 434 (64.2%)        | 40 (11.8%)                    | 162 (47.9%)           | 136 (40.2%)          |
| Caucasian | Sweden – Stockholm               | PD            | G: 68 (37.8%)         | A: 112 (62.2%)        | 15 (16.7%)                    | 38 (42.2%)            | 37 (41.1%)           |
| Caucasian | Sweden – Stockholm               | Controls      | G: 130 (36.3%)        | A: 228 (63.7%)        | 25 (14.0%)                    | 80 (44.7%)            | 74 (41.3%)           |
| Caucasian | United States - Jacksonville, FL | PD            | G: 339 (45.3%)        | A: 409 (54.7%)        | 80 (21.4%)                    | 179 (47.9%)           | 115 (30.7%)          |
| Caucasian | United States - Jacksonville, FL | Controls      | G: 248 (34.8%)        | A: 464 (65.2%)        | 44 (12.4%)                    | 160 (44.9%)           | 152 (42.7%)          |
| Caucasian | United States - Rochester, MN    | PD            | G: 529 (37.8%)        | A: 869 (62.2%)        | 96 (13.7%)                    | 337 (48.2%)           | 266 (38.1%)          |
| Caucasian | United States - Rochester, MN    | Controls      | G: 130 (36.9%)        | A: 222 (63.1%)        | 23 (13.1%)                    | 84 (47.7%)            | 69 (39.2%)           |
| Asian     | Japan – Tokyo                    | PD            | A: 111 (32.6%)        | G: 229 (67.4%)        | 18 (10.6%)                    | 75 (44.1%)            | 77 (45.3%)           |
| Asian     | Japan – Tokyo                    | Controls      | A: 73 (44.0%)         | G: 93 (56.0%)         | 14 (16.9%)                    | 45 (54.2%)            | 24 (28.9%)           |
| Asian     | Korea - Anyang Hallym            | PD            | A: 92 (35.1%)         | G: 170 (64.9%)        | 18 (13.7%)                    | 56 (42.7%)            | 57 (43.5%)           |
| Asian     | Korea - Anyang Hallym            | Controls      | A: 106 (44.2%)        | G: 134 (55.8%)        | 28 (23.3%)                    | 50 (41.7%)            | 42 (35.0%)           |
| Asian     | Korea – Seoul                    | PD            | A: 472 (36.4%)        | G: 824 (63.6%)        | 78 (12.0%)                    | 316 (48.8%)           | 254 (39.2%)          |
| Asian     | Korea – Seoul                    | Controls      | A: 362 (45.5%)        | G: 434 (54.5%)        | 88 (22.1%)                    | 186 (46.7%)           | 124 (31.2%)          |
| Asian     | Taiwan – Taipei                  | PD            | A: 282 (39.5%)        | G: 432 (60.5%)        | 55 (15.4%)                    | 172 (48.2%)           | 130 (36.4%)          |
| Asian     | Taiwan – Taipei                  | Controls      | A: 285 (49.1%)        | G: 295 (50.9%)        | 68 (23.4%)                    | 149 (51.4%)           | 73 (25.2%)           |

Supplementary Table 3d: Genotype counts and frequencies for SNCA rs11931074 for each site

| Series    | Country/Site                     | Disease group | Minor allele count, % | Major allele count, % | Minor-Minor genotype count, % | Heterozygous count, % | Major-Major count, % |
|-----------|----------------------------------|---------------|-----------------------|-----------------------|-------------------------------|-----------------------|----------------------|
| Caucasian | Australia – Queensland           | PD            | T: 150 (8.2%)         | G: 1678 (91.8%)       | 6 (0.7%)                      | 138 (15.1%)           | 770 (84.2%)          |
| Caucasian | Australia – Queensland           | Controls      | T: 102 (7.2%)         | G: 1310 (92.8%)       | 4 (0.6%)                      | 94 (13.3%)            | 608 (86.1%)          |
| Caucasian | France – Lille                   | PD            | T: 96 (8.8%)          | G: 998 (91.2%)        | 4 (0.7%)                      | 88 (16.1%)            | 455 (83.2%)          |
| Caucasian | France – Lille                   | Controls      | T: 20 (7.0%)          | G: 266 (93.0%)        | 1 (0.7%)                      | 18 (12.6%)            | 124 (86.7%)          |
| Caucasian | Germany – Frankfurt              | PD            | T: 45 (9.7%)          | G: 419 (90.3%)        | 5 (2.2%)                      | 35 (15.1%)            | 192 (82.8%)          |
| Caucasian | Germany – Frankfurt              | Controls      | T: 5 (5.3%)           | G: 89 (94.7%)         | 0 (0.0%)                      | 5 (10.6%)             | 42 (89.4%)           |
| Caucasian | Germany – Luebeck                | PD            | T: 81 (7.9%)          | G: 941 (92.1%)        | 5 (1.0%)                      | 71 (13.9%)            | 435 (85.1%)          |
| Caucasian | Germany – Luebeck                | Controls      | T: 37 (6.4%)          | G: 539 (93.6%)        | 1 (0.3%)                      | 35 (12.2%)            | 252 (87.5%)          |
| Caucasian | Germany – Tuebingen              | PD            | T: 62 (9.4%)          | G: 598 (90.6%)        | 4 (1.2%)                      | 54 (16.4%)            | 272 (82.4%)          |
| Caucasian | Germany – Tuebingen              | Controls      | T: 43 (6.4%)          | G: 633 (93.6%)        | 3 (0.9%)                      | 37 (10.9%)            | 298 (88.2%)          |
| Caucasian | Greece – Athens                  | PD            | T: 21 (7.9%)          | G: 245 (92.1%)        | 2 (1.5%)                      | 17 (12.8%)            | 114 (85.7%)          |
| Caucasian | Greece – Athens                  | Controls      | T: 8 (4.4%)           | G: 174 (95.6%)        | 0 (0.0%)                      | 8 (8.8%)              | 83 (91.2%)           |
| Caucasian | Greece – Thessaly                | PD            | T: 58 (9.3%)          | G: 564 (90.7%)        | 0 (0.0%)                      | 58 (18.6%)            | 253 (81.4%)          |
| Caucasian | Greece – Thessaly                | Controls      | T: 52 (8.4%)          | G: 566 (91.6%)        | 2 (0.6%)                      | 48 (15.5%)            | 259 (83.8%)          |
| Caucasian | Ireland – Dublin                 | PD            | T: 68 (9.5%)          | G: 646 (90.5%)        | 2 (0.6%)                      | 64 (17.9%)            | 291 (81.5%)          |
| Caucasian | Ireland – Dublin                 | Controls      | T: 55 (6.2%)          | G: 831 (93.8%)        | 3 (0.7%)                      | 49 (11.1%)            | 391 (88.3%)          |
| Caucasian | Italy – Mangone                  | PD            | T: 26 (7.1%)          | G: 342 (92.9%)        | 0 (0.0%)                      | 26 (14.1%)            | 158 (85.9%)          |
| Caucasian | Italy – Mangone                  | Controls      | T: 28 (8.3%)          | G: 308 (91.7%)        | 1 (0.6%)                      | 26 (15.5%)            | 141 (83.9%)          |
| Caucasian | Italy – Milan                    | PD            | T: 25 (13.2%)         | G: 165 (86.8%)        | 2 (2.1%)                      | 21 (22.1%)            | 72 (75.8%)           |
| Caucasian | Italy – Milan                    | Controls      | T: 12 (6.0%)          | G: 188 (94.0%)        | 0 (0.0%)                      | 12 (12.0%)            | 88 (88.0%)           |
| Caucasian | Italy – Rome                     | PD            | T: 38 (10.2%)         | G: 336 (89.8%)        | 3 (1.6%)                      | 32 (17.1%)            | 152 (81.3%)          |
| Caucasian | Italy – Rome                     | Controls      | T: 14 (7.5%)          | G: 172 (92.5%)        | 0 (0.0%)                      | 14 (15.1%)            | 79 (84.9%)           |
| Caucasian | Norway – Trondheim               | PD            | T: 136 (11.5%)        | G: 1046 (88.5%)       | 5 (0.8%)                      | 126 (21.3%)           | 460 (77.8%)          |
| Caucasian | Norway – Trondheim               | Controls      | T: 82 (7.9%)          | G: 956 (92.1%)        | 2 (0.4%)                      | 78 (15.0%)            | 439 (84.6%)          |
| Caucasian | Poland - Katowice                | PD            | T: 53 (7.6%)          | G: 641 (92.4%)        | 2 (0.6%)                      | 49 (14.1%)            | 296 (85.3%)          |
| Caucasian | Poland - Katowice                | Controls      | T: 45 (6.6%)          | G: 633 (93.4%)        | 3 (0.9%)                      | 39 (11.5%)            | 297 (87.6%)          |
| Caucasian | Sweden – Stockholm               | PD            | T: 18 (10.0%)         | G: 162 (90.0%)        | 0 (0.0%)                      | 18 (20.0%)            | 72 (80.0%)           |
| Caucasian | Sweden – Stockholm               | Controls      | T: 28 (7.8%)          | G: 332 (92.2%)        | 0 (0.0%)                      | 28 (15.6%)            | 152 (84.4%)          |
| Caucasian | United States - Jacksonville, FL | PD            | T: 76 (10.1%)         | G: 676 (89.9%)        | 3 (0.8%)                      | 70 (18.6%)            | 303 (80.6%)          |
| Caucasian | United States - Jacksonville, FL | Controls      | T: 55 (7.6%)          | G: 669 (92.4%)        | 4 (1.1%)                      | 47 (13.0%)            | 311 (85.9%)          |
| Caucasian | United States - Rochester, MN    | PD            | T: 136 (9.1%)         | G: 1358 (90.9%)       | 5 (0.7%)                      | 126 (16.9%)           | 616 (82.5%)          |
| Caucasian | United States - Rochester, MN    | Controls      | T: 24 (6.9%)          | G: 326 (93.1%)        | 1 (0.6%)                      | 22 (12.6%)            | 152 (86.9%)          |
| Asian     | Japan – Tokyo                    | PD            | G: 112 (33.1%)        | T: 226 (66.9%)        | 19 (11.2%)                    | 74 (43.8%)            | 76 (45.0%)           |
| Asian     | Japan – Tokyo                    | Controls      | G: 86 (47.8%)         | T: 94 (52.2%)         | 20 (22.2%)                    | 46 (51.1%)            | 24 (26.7%)           |
| Asian     | Korea - Anyang Hallym            | PD            | G: 117 (39.8%)        | T: 177 (60.2%)        | 26 (17.7%)                    | 65 (44.2%)            | 56 (38.1%)           |
| Asian     | Korea - Anyang Hallym            | Controls      | G: 136 (47.9%)        | T: 148 (52.1%)        | 33 (23.2%)                    | 70 (49.3%)            | 39 (27.5%)           |
| Asian     | Korea – Seoul                    | PD            | G: 486 (36.8%)        | T: 836 (63.2%)        | 81 (12.3%)                    | 324 (49.0%)           | 256 (38.7%)          |
| Asian     | Korea – Seoul                    | Controls      | G: 367 (45.4%)        | T: 441 (54.6%)        | 90 (22.3%)                    | 187 (46.3%)           | 127 (31.4%)          |
| Asian     | Taiwan – Taipei                  | PD            | G: 297 (40.4%)        | T: 439 (59.6%)        | 58 (15.8%)                    | 181 (49.2%)           | 129 (35.1%)          |
| Asian     | Taiwan - Taipei                  | Controls      | G: 279 (47.0%)        | T: 315 (53.0%)        | 65 (21.9%)                    | 149 (50.2%)           | 83 (27.9%)           |

Supplementary Table 3e: Genotype counts and frequencies for *SNCA* rs2583988 for each site

| Series    | Country/Site                     | Disease group | Minor allele count, % | Major allele count, % | Minor-Minor genotype count, % | Heterozygous count, % | Major-Major count, % |
|-----------|----------------------------------|---------------|-----------------------|-----------------------|-------------------------------|-----------------------|----------------------|
| Caucasian | Australia – Queensland           | PD            | T: 522 (28.5%)        | C: 1310 (71.5%)       | 70 (7.6%)                     | 382 (41.7%)           | 464 (50.7%)          |
| Caucasian | Australia – Queensland           | Controls      | T: 388 (27.6%)        | C: 1018 (72.4%)       | 56 (8.0%)                     | 276 (39.3%)           | 371 (52.8%)          |
| Caucasian | France – Lille                   | PD            | T: 348 (31.8%)        | C: 746 (68.2%)        | 53 (9.7%)                     | 242 (44.2%)           | 252 (46.1%)          |
| Caucasian | France – Lille                   | Controls      | T: 77 (26.9%)         | C: 209 (73.1%)        | 8 (5.6%)                      | 61 (42.7%)            | 74 (51.7%)           |
| Caucasian | Germany – Frankfurt              | PD            | T: 135 (29.3%)        | C: 325 (70.7%)        | 18 (7.8%)                     | 99 (43.0%)            | 113 (49.1%)          |
| Caucasian | Germany – Frankfurt              | Controls      | T: 29 (32.2%)         | C: 61 (67.8%)         | 6 (13.3%)                     | 17 (37.8%)            | 22 (48.9%)           |
| Caucasian | Germany – Luebeck                | PD            | T: 345 (33.8%)        | C: 677 (66.2%)        | 70 (13.7%)                    | 205 (40.1%)           | 236 (46.2%)          |
| Caucasian | Germany – Luebeck                | Controls      | T: 147 (25.5%)        | C: 429 (74.5%)        | 22 (7.6%)                     | 103 (35.8%)           | 163 (56.6%)          |
| Caucasian | Germany – Tuebingen              | PD            | T: 195 (29.5%)        | C: 465 (70.5%)        | 32 (9.7%)                     | 131 (39.7%)           | 167 (50.6%)          |
| Caucasian | Germany – Tuebingen              | Controls      | T: 180 (26.6%)        | C: 496 (73.4%)        | 21 (6.2%)                     | 138 (40.8%)           | 179 (53.0%)          |
| Caucasian | Greece – Athens                  | PD            | T: 81 (30.7%)         | C: 183 (69.3%)        | 9 (6.8%)                      | 63 (47.7%)            | 60 (45.5%)           |
| Caucasian | Greece – Athens                  | Controls      | T: 56 (29.8%)         | C: 132 (70.2%)        | 9 (9.6%)                      | 38 (40.4%)            | 47 (50.0%)           |
| Caucasian | Greece – Thessaly                | PD            | T: 194 (31.4%)        | C: 424 (68.6%)        | 35 (11.3%)                    | 124 (40.1%)           | 150 (48.5%)          |
| Caucasian | Greece – Thessaly                | Controls      | T: 164 (27.2%)        | C: 438 (72.8%)        | 25 (8.3%)                     | 114 (37.9%)           | 162 (53.8%)          |
| Caucasian | Ireland – Dublin                 | PD            | T: 233 (33.8%)        | C: 457 (66.2%)        | 38 (11.0%)                    | 157 (45.5%)           | 150 (43.5%)          |
| Caucasian | Ireland – Dublin                 | Controls      | T: 222 (29.7%)        | C: 642 (74.3%)        | 33 (7.6%)                     | 156 (36.1%)           | 243 (56.2%)          |
| Caucasian | Italy – Mangone                  | PD            | T: 116 (31.5%)        | C: 252 (68.5%)        | 17 (9.2%)                     | 82 (44.6%)            | 85 (46.2%)           |
| Caucasian | Italy – Mangone                  | Controls      | T: 74 (22.0%)         | C: 262 (78.0%)        | 7 (4.2%)                      | 60 (35.7%)            | 101 (60.1%)          |
| Caucasian | Italy – Milan                    | PD            | T: 52 (27.7%)         | C: 136 (72.3%)        | 5 (5.3%)                      | 42 (44.7%)            | 47 (50.0%)           |
| Caucasian | Italy – Milan                    | Controls      | T: 48 (23.5%)         | C: 156 (76.5%)        | 7 (6.9%)                      | 34 (33.3%)            | 61 (59.8%)           |
| Caucasian | Italy – Rome                     | PD            | T: 113 (29.9%)        | C: 265 (70.1%)        | 18 (9.5%)                     | 77 (40.7%)            | 94 (49.7%)           |
| Caucasian | Italy – Rome                     | Controls      | T: 44 (23.2%)         | C: 146 (76.8%)        | 5 (5.3%)                      | 34 (35.8%)            | 56 (58.9%)           |
| Caucasian | Norway – Trondheim               | PD            | T: 367 (30.5%)        | C: 835 (69.5%)        | 74 (12.3%)                    | 219 (36.4%)           | 308 (51.2%)          |
| Caucasian | Norway – Trondheim               | Controls      | T: 333 (31.7%)        | C: 719 (68.3%)        | 57 (10.8%)                    | 219 (41.6%)           | 250 (47.5%)          |
| Caucasian | Poland - Katowice                | PD            | T: 195 (28.0%)        | C: 501 (72.0%)        | 33 (9.5%)                     | 129 (37.1%)           | 186 (53.4%)          |
| Caucasian | Poland - Katowice                | Controls      | T: 155 (23.1%)        | C: 517 (76.9%)        | 27 (8.0%)                     | 101 (30.1%)           | 208 (61.9%)          |
| Caucasian | Sweden – Stockholm               | PD            | T: 47 (25.8%)         | C: 135 (74.2%)        | 5 (5.5%)                      | 37 (40.7%)            | 49 (53.8%)           |
| Caucasian | Sweden – Stockholm               | Controls      | T: 89 (24.9%)         | C: 269 (75.1%)        | 15 (8.4%)                     | 59 (33.0%)            | 105 (58.7%)          |
| Caucasian | United States - Jacksonville, FL | PD            | T: 246 (32.6%)        | C: 508 (67.4%)        | 40 (10.6%)                    | 166 (44.0%)           | 171 (45.4%)          |
| Caucasian | United States - Jacksonville, FL | Controls      | T: 168 (23.3%)        | C: 554 (76.7%)        | 22 (6.1%)                     | 124 (34.3%)           | 215 (59.6%)          |
| Caucasian | United States - Rochester, MN    | PD            | T: 431 (29.8%)        | C: 1015 (70.2%)       | 76 (10.5%)                    | 279 (38.6%)           | 368 (50.9%)          |
| Caucasian | United States - Rochester, MN    | Controls      | T: 96 (27.3%)         | C: 256 (72.7%)        | 13 (7.4%)                     | 70 (39.8%)            | 93 (52.8%)           |
| Asian     | Japan – Tokyo                    | PD            | T: 0 (0.0%)           | C: 340 (100.0%)       | 0 (0.0%)                      | 0 (0.0%)              | 170 (100.0%)         |
| Asian     | Japan – Tokyo                    | Controls      | T: 0 (0.0%)           | C: 178 (100.0%)       | 0 (0.0%)                      | 0 (0.0%)              | 89 (100.0%)          |
| Asian     | Korea - Anyang Hallym            | PD            | T: 0 (0.0%)           | C: 294 (100.0%)       | 0 (0.0%)                      | 0 (0.0%)              | 147 (100.0%)         |
| Asian     | Korea - Anyang Hallym            | Controls      | T: 0 (0.0%)           | C: 284 (100.0%)       | 0 (0.0%)                      | 0 (0.0%)              | 142 (100.0%)         |
| Asian     | Korea – Seoul                    | PD            | T: 0 (0.0%)           | C: 1302 (100.0%)      | 0 (0.0%)                      | 0 (0.0%)              | 651 (100.0%)         |
| Asian     | Korea – Seoul                    | Controls      | T: 0 (0.0%)           | C: 802 (100.0%)       | 0 (0.0%)                      | 0 (0.0%)              | 401 (100.0%)         |
| Asian     | Taiwan – Taipei                  | PD            | T: 0 (0.0%)           | C: 724 (100.0%)       | 0 (0.0%)                      | 0 (0.0%)              | 362 (100.0%)         |
| Asian     | Taiwan – Taipei                  | Controls      | T: 1 (0.2%)           | C: 587 (99.8%)        | 0 (0.0%)                      | 1 (0.3%)              | 293 (99.7%)          |

Supplementary Table 3f: Genotype counts and frequencies for LRRK2 p.R1398H for each site

| Series    | Country/Site                     | Disease group | Minor allele count, % | Major allele count, % | Minor-Minor genotype count, % | Heterozygous count, % | Major-Major count, % |
|-----------|----------------------------------|---------------|-----------------------|-----------------------|-------------------------------|-----------------------|----------------------|
| Caucasian | Australia - Queensland           | PD            | A: 109 (5.9%)         | G: 1729 (94.1%)       | 6 (0.7%)                      | 97 (10.6%)            | 816 (88.8%)          |
| Caucasian | Australia - Queensland           | Controls      | A: 104 (7.3%)         | G: 1316 (92.7%)       | 5 (0.7%)                      | 94 (13.2%)            | 611 (86.1%)          |
| Caucasian | France - Lille                   | PD            | A: 48 (4.4%)          | G: 1034 (95.6%)       | 3 (0.6%)                      | 42 (7.8%)             | 496 (91.7%)          |
| Caucasian | France - Lille                   | Controls      | A: 12 (4.3%)          | G: 270 (95.7%)        | 0 (0.0%)                      | 12 (8.5%)             | 129 (91.5%)          |
| Caucasian | Germany - Frankfurt              | PD            | A: 20 (4.4%)          | G: 438 (95.6%)        | 1 (0.4%)                      | 18 (7.9%)             | 210 (91.7%)          |
| Caucasian | Germany - Frankfurt              | Controls      | A: 5 (5.3%)           | G: 89 (94.7%)         | 0 (0.0%)                      | 5 (10.6%)             | 42 (89.4%)           |
| Caucasian | Germany - Luebeck                | PD            | A: 62 (6.1%)          | G: 958 (93.9%)        | 4 (0.8%)                      | 54 (10.6%)            | 452 (88.6%)          |
| Caucasian | Germany - Luebeck                | Controls      | A: 52 (9.2%)          | G: 516 (90.8%)        | 0 (0.0%)                      | 52 (18.3%)            | 232 (81.7%)          |
| Caucasian | Germany - Tuebingen              | PD            | A: 46 (7.0%)          | G: 608 (93.0%)        | 2 (0.6%)                      | 42 (12.8%)            | 283 (86.5%)          |
| Caucasian | Germany - Tuebingen              | Controls      | A: 51 (7.5%)          | G: 627 (92.5%)        | 1 (0.3%)                      | 49 (14.5%)            | 289 (85.3%)          |
| Caucasian | Greece - Athens                  | PD            | A: 7 (2.6%)           | G: 259 (97.4%)        | 0 (0.0%)                      | 7 (5.3%)              | 126 (94.7%)          |
| Caucasian | Greece - Athens                  | Controls      | A: 7 (3.8%)           | G: 179 (96.2%)        | 0 (0.0%)                      | 7 (7.5%)              | 86 (92.5%)           |
| Caucasian | Greece - Thessaly                | PD            | A: 27 (4.3%)          | G: 601 (95.7%)        | 0 (0.0%)                      | 27 (8.6%)             | 287 (91.4%)          |
| Caucasian | Greece - Thessaly                | Controls      | A: 35 (6.0%)          | G: 553 (94.0%)        | 0 (0.0%)                      | 35 (11.9%)            | 259 (88.1%)          |
| Caucasian | Ireland - Dublin                 | PD            | A: 39 (5.5%)          | G: 673 (94.5%)        | 4 (1.1%)                      | 31 (8.7%)             | 321 (90.2%)          |
| Caucasian | Ireland - Dublin                 | Controls      | A: 73 (8.2%)          | G: 815 (91.8%)        | 3 (0.7%)                      | 67 (15.1%)            | 374 (84.2%)          |
| Caucasian | Italy - Mangone                  | PD            | A: 26 (7.2%)          | G: 336 (92.8%)        | 1 (0.6%)                      | 24 (13.3%)            | 156 (86.2%)          |
| Caucasian | Italy - Mangone                  | Controls      | A: 24 (7.2%)          | G: 310 (92.8%)        | 0 (0.0%)                      | 24 (14.4%)            | 143 (85.6%)          |
| Caucasian | Italy - Milan                    | PD            | A: 11 (6.0%)          | G: 171 (94.0%)        | 0 (0.0%)                      | 11 (12.1%)            | 80 (87.9%)           |
| Caucasian | Italy - Milan                    | Controls      | A: 8 (4.1%)           | G: 186 (95.9%)        | 0 (0.0%)                      | 8 (8.2%)              | 89 (91.8%)           |
| Caucasian | Italy - Rome                     | PD            | A: 20 (5.5%)          | G: 346 (94.5%)        | 0 (0.0%)                      | 20 (10.9%)            | 163 (89.1%)          |
| Caucasian | Italy - Rome                     | Controls      | A: 13 (6.9%)          | G: 175 (93.1%)        | 0 (0.0%)                      | 13 (13.8%)            | 81 (86.2%)           |
| Caucasian | Norway - Trondheim               | PD            | A: 102 (8.5%)         | G: 1094 (91.5%)       | 0 (0.0%)                      | 102 (17.1%)           | 496 (82.9%)          |
| Caucasian | Norway - Trondheim               | Controls      | A: 83 (8.0%)          | G: 961 (92.0%)        | 3 (0.6%)                      | 77 (14.8%)            | 442 (84.7%)          |
| Caucasian | Poland - Katowice                | PD            | A: 43 (6.2%)          | G: 655 (93.8%)        | 1 (0.3%)                      | 41 (11.7%)            | 307 (88.0%)          |
| Caucasian | Poland - Katowice                | Controls      | A: 42 (6.2%)          | G: 638 (93.8%)        | 2 (0.6%)                      | 38 (11.2%)            | 300 (88.2%)          |
| Caucasian | Sweden - Stockholm               | PD            | A: 15 (8.4%)          | G: 163 (91.6%)        | 2 (2.2%)                      | 11 (12.4%)            | 76 (85.4%)           |
| Caucasian | Sweden - Stockholm               | Controls      | A: 36 (10.5%)         | G: 308 (89.5%)        | 1 (0.6%)                      | 34 (19.8%)            | 137 (79.7%)          |
| Caucasian | United States - Jacksonville, FL | PD            | A: 65 (8.8%)          | G: 675 (91.2%)        | 4 (1.1%)                      | 57 (15.4%)            | 309 (83.5%)          |
| Caucasian | United States - Jacksonville, FL | Controls      | A: 52 (7.2%)          | G: 674 (92.8%)        | 0 (0.0%)                      | 52 (14.3%)            | 311 (85.7%)          |
| Caucasian | United States - Rochester, MN    | PD            | A: 102 (7.2%)         | G: 1306 (92.8%)       | 2 (0.3%)                      | 98 (13.9%)            | 604 (85.8%)          |
| Caucasian | United States - Rochester, MN    | Controls      | A: 20 (5.7%)          | G: 330 (94.3%)        | 0 (0.0%)                      | 20 (11.4%)            | 155 (88.6%)          |
| Asian     | Japan - Tokyo                    | PD            | A: 39 (11.4%)         | G: 303 (88.6%)        | 4 (2.3%)                      | 31 (18.1%)            | 136 (79.5%)          |
| Asian     | Japan - Tokyo                    | Controls      | A: 16 (9.0%)          | G: 162 (91.0%)        | 0 (0.0%)                      | 16 (18.0%)            | 73 (82.0%)           |
| Asian     | Korea - Anyang Hallym            | PD            | A: 40 (13.4%)         | G: 258 (86.6%)        | 5 (3.4%)                      | 30 (20.1%)            | 114 (76.5%)          |
| Asian     | Korea - Anyang Hallym            | Controls      | A: 46 (16%)           | G: 242 (84.0%)        | 1 (0.7%)                      | 44 (30.6%)            | 99 (68.8%)           |
| Asian     | Korea - Seoul                    | PD            | A: 142 (10.8%)        | G: 1172 (89.2%)       | 9 (1.4%)                      | 124 (18.9%)           | 524 (79.8%)          |
| Asian     | Korea - Seoul                    | Controls      | A: 117 (14.5%)        | G: 689 (85.5%)        | 6 (1.5%)                      | 105 (26.1%)           | 292 (72.5%)          |
| Asian     | Taiwan - Taipei                  | PD            | A: 63 (8.6%)          | G: 673 (91.4%)        | 5 (1.4%)                      | 53 (14.4%)            | 310 (84.2%)          |
| Asian     | Taiwan - Taipei                  | Controls      | A: 60 (10.2%)         | G: 530 (89.8%)        | 2 (0.7%)                      | 56 (19.0%)            | 237 (80.3%)          |



Supplementary Table 3g: Genotype counts and frequencies for *MAPT* rs1052553 for each site

| Series    | Country/Site                     | Disease group | Minor allele count, % | Major allele count, % | Minor-Minor genotype count, % | Heterozygous count, % | Major-Major genotype count, % |
|-----------|----------------------------------|---------------|-----------------------|-----------------------|-------------------------------|-----------------------|-------------------------------|
| Caucasian | Australia - Queensland           | PD            | G: 360 (19.5%)        | A: 1486 (80.5%)       | 41 (4.4%)                     | 278 (30.1%)           | 604 (65.4%)                   |
| Caucasian | Australia - Queensland           | Controls      | G: 344 (24.1%)        | A: 1082 (75.9%)       | 40 (5.6%)                     | 264 (37.0%)           | 409 (57.4%)                   |
| Caucasian | France - Lille                   | PD            | G: 223 (20.3%)        | A: 873 (79.7%)        | 31 (5.7%)                     | 161 (29.4%)           | 356 (65.0%)                   |
| Caucasian | France - Lille                   | Controls      | G: 59 (20.6%)         | A: 227 (79.4%)        | 7 (4.9%)                      | 45 (31.5%)            | 91 (63.6%)                    |
| Caucasian | Germany - Frankfurt              | PD            | G: 70 (15.1%)         | A: 394 (84.9%)        | 4 (1.7%)                      | 62 (26.7%)            | 166 (71.6%)                   |
| Caucasian | Germany - Frankfurt              | Controls      | G: 16 (17.0%)         | A: 78 (83.0%)         | 0 (0.0%)                      | 16 (34.0%)            | 31 (66.0%)                    |
| Caucasian | Germany - Luebeck                | PD            | G: 172 (16.8%)        | A: 852 (83.2%)        | 18 (3.5%)                     | 136 (26.6%)           | 358 (69.9%)                   |
| Caucasian | Germany - Luebeck                | Controls      | G: 110 (19.0%)        | A: 468 (81.0%)        | 14 (4.8%)                     | 82 (28.4%)            | 193 (66.8%)                   |
| Caucasian | Germany - Tuebingen              | PD            | G: 113 (17.1%)        | A: 547 (82.9%)        | 9 (2.7%)                      | 95 (28.8%)            | 226 (68.5%)                   |
| Caucasian | Germany - Tuebingen              | Controls      | G: 134 (19.8%)        | A: 544 (80.2%)        | 14 (4.1%)                     | 106 (31.3%)           | 219 (64.6%)                   |
| Caucasian | Greece - Athens                  | PD            | G: 37 (13.8%)         | A: 231 (86.2%)        | 3 (2.2%)                      | 31 (23.1%)            | 100 (74.6%)                   |
| Caucasian | Greece - Athens                  | Controls      | G: 37 (19.7%)         | A: 151 (80.3%)        | 5 (5.3%)                      | 27 (28.7%)            | 62 (66.0%)                    |
| Caucasian | Greece - Thessaly                | PD            | G: 121 (19.1%)        | A: 511 (80.9%)        | 12 (3.8%)                     | 97 (30.7%)            | 207 (65.5%)                   |
| Caucasian | Greece - Thessaly                | Controls      | G: 117 (18.8%)        | A: 505 (81.2%)        | 11 (3.5%)                     | 95 (30.5%)            | 205 (65.9%)                   |
| Caucasian | Ireland - Dublin                 | PD            | G: 115 (16.0%)        | A: 605 (84.0%)        | 12 (3.3%)                     | 91 (25.3%)            | 257 (71.4%)                   |
| Caucasian | Ireland - Dublin                 | Controls      | G: 196 (22.1%)        | A: 692 (77.9%)        | 23 (5.2%)                     | 150 (33.8%)           | 271 (61.0%)                   |
| Caucasian | Italy - Mangone                  | PD            | G: 86 (23.2%)         | A: 284 (76.8%)        | 8 (4.3%)                      | 70 (37.8%)            | 107 (57.8%)                   |
| Caucasian | Italy - Mangone                  | Controls      | G: 84 (25.0%)         | A: 252 (75.0%)        | 10 (6.0%)                     | 64 (38.1%)            | 94 (56.0%)                    |
| Caucasian | Italy - Milan                    | PD            | G: 38 (20.0%)         | A: 152 (80.0%)        | 4 (4.2%)                      | 30 (31.6%)            | 61 (64.2%)                    |
| Caucasian | Italy - Milan                    | Controls      | G: 60 (29.4%)         | A: 144 (70.6%)        | 16 (15.7%)                    | 28 (27.5%)            | 58 (56.9%)                    |
| Caucasian | Italy - Rome                     | PD            | G: 91 (24.1%)         | A: 287 (75.9%)        | 15 (7.9%)                     | 61 (32.3%)            | 113 (59.8%)                   |
| Caucasian | Italy - Rome                     | Controls      | G: 49 (25.8%)         | A: 141 (74.2%)        | 5 (5.3%)                      | 39 (41.1%)            | 51 (53.7%)                    |
| Caucasian | Norway - Trondheim               | PD            | G: 179 (14.9%)        | A: 1025 (85.1%)       | 16 (2.7%)                     | 147 (24.4%)           | 439 (72.9%)                   |
| Caucasian | Norway - Trondheim               | Controls      | G: 191 (18.2%)        | A: 861 (81.8%)        | 18 (3.4%)                     | 155 (29.5%)           | 353 (67.1%)                   |
| Caucasian | Poland - Katowice                | PD            | G: 95 (13.6%)         | A: 603 (86.4%)        | 6 (1.7%)                      | 83 (23.8%)            | 260 (74.5%)                   |
| Caucasian | Poland - Katowice                | Controls      | G: 100 (14.7%)        | A: 580 (85.3%)        | 15 (4.4%)                     | 70 (20.6%)            | 255 (75.0%)                   |
| Caucasian | Sweden - Stockholm               | PD            | G: 27 (14.8%)         | A: 155 (85.2%)        | 2 (2.2%)                      | 23 (25.3%)            | 66 (72.5%)                    |
| Caucasian | Sweden - Stockholm               | Controls      | G: 51 (14.2%)         | A: 309 (85.8%)        | 3 (1.7%)                      | 45 (25.0%)            | 132 (73.3%)                   |
| Caucasian | United States - Jacksonville, FL | PD            | G: 143 (19.0%)        | A: 611 (81.0%)        | 15 (4.0%)                     | 113 (30.0%)           | 249 (66.0%)                   |
| Caucasian | United States - Jacksonville, FL | Controls      | G: 173 (23.8%)        | A: 555 (76.2%)        | 20 (5.5%)                     | 133 (36.5%)           | 211 (58.0%)                   |
| Caucasian | United States - Rochester, MN    | PD            | G: 241 (16.1%)        | A: 1255 (83.9%)       | 22 (2.9%)                     | 197 (26.3%)           | 529 (70.7%)                   |
| Caucasian | United States - Rochester, MN    | Controls      | G: 73 (20.7%)         | A: 279 (79.3%)        | 10 (5.7%)                     | 53 (30.1%)            | 113 (64.2%)                   |
| Asian     | Japan - Tokyo                    | PD            | G: 0 (0.0%)           | A: 338 (100.0%)       | 0 (0.0%)                      | 0 (0.0%)              | 169 (100.0%)                  |
| Asian     | Japan - Tokyo                    | Controls      | G: 0 (0.0%)           | A: 178 (100.0%)       | 0 (0.0%)                      | 0 (0.0%)              | 89 (100.0%)                   |
| Asian     | Korea - Anyang Hallym            | PD            | G: 1 (0.4%)           | A: 281 (99.6%)        | 0 (0.0%)                      | 1 (0.7%)              | 140 (99.3%)                   |
| Asian     | Korea - Anyang Hallym            | Controls      | G: 0 (0.0%)           | A: 270 (100.0%)       | 0 (0.0%)                      | 0 (0.0%)              | 135 (100.0%)                  |
| Asian     | Korea - Seoul                    | PD            | G: 1 (0.1%)           | A: 1269 (99.9%)       | 0 (0.0%)                      | 1 (0.2%)              | 634 (99.8%)                   |
| Asian     | Korea - Seoul                    | Controls      | G: 0 (0.0%)           | A: 810 (100.0%)       | 0 (0.0%)                      | 0 (0.0%)              | 405 (100.0%)                  |
| Asian     | Taiwan - Taipei                  | PD            | G: 3 (0.4%)           | A: 727 (99.6%)        | 0 (0.0%)                      | 3 (0.8%)              | 362 (99.2%)                   |
| Asian     | Taiwan - Taipei                  | Controls      | G: 0 (0.0%)           | A: 594 (100.0%)       | 0 (0.0%)                      | 0 (0.0%)              | 297 (100.0%)                  |

Supplementary Table 4: Single variant associations with PD

| Variant & Genotype/Model            | Caucasian series (5991 PD, 4331 controls) |                    |         | Asian series (1351 PD, 938 controls) |                    |         |
|-------------------------------------|-------------------------------------------|--------------------|---------|--------------------------------------|--------------------|---------|
|                                     | Sample Frequency                          | OR (95% CI)        | P-value | Sample Frequency                     | OR (95% CI)        | P-value |
| <i>SNCA</i> rs181489                |                                           |                    |         |                                      |                    |         |
| Genotype                            |                                           |                    |         |                                      |                    |         |
| CC                                  | 46.0%                                     | 1.00 (reference)   | ---     | ---                                  | ---                | ---     |
| CT                                  | 42.8%                                     | 1.16 (1.06 - 1.26) | 0.0012  | ---                                  | ---                | ---     |
| TT                                  | 11.2%                                     | 1.67 (1.45 - 1.92) | 1.4E-12 | ---                                  | ---                | ---     |
| Additive                            |                                           | 1.24 (1.17 - 1.32) | 6.7E-12 | ---                                  | ---                | ---     |
| Dominant                            | MAF: 32.6%                                | 1.25 (1.15 - 1.35) | 2.1E-7  | ---                                  | ---                | ---     |
| Recessive                           |                                           | 1.56 (1.36 - 1.78) | 1.5E-10 | ---                                  | ---                | ---     |
| <i>SNCA</i> rs356219 <sup>1</sup>   |                                           |                    |         |                                      |                    |         |
| Genotype                            |                                           |                    |         |                                      |                    |         |
| AA                                  | 35.2%                                     | 1.00 (reference)   | ---     | 16.7%                                | 1.00 (reference)   | ---     |
| AG                                  | 47.9%                                     | 1.17 (1.07 - 1.28) | 7.0E-4  | 47.7%                                | 1.66 (1.30 - 2.11) | 4.0E-5  |
| GG                                  | 16.9%                                     | 1.50 (1.33 - 1.70) | 6.9E-11 | 35.5%                                | 2.26 (1.75 - 2.92) | 3.4E-10 |
| Additive                            |                                           | 1.21 (1.15 - 1.29) | 9.1E-11 |                                      | 1.48 (1.31 - 1.68) | 5.9E-10 |
| Dominant                            | MAF: 40.8%                                | 1.25 (1.15 - 1.36) | 3.9E-7  | MAF: 40.6%                           | 1.88 (1.50 - 2.37) | 4.5E-08 |
| Recessive                           |                                           | 1.37 (1.23 - 1.53) | 2.0E-8  |                                      | 1.56 (1.30 - 1.87) | 1.9E-06 |
| <i>SNCA</i> rs11931074 <sup>1</sup> |                                           |                    |         |                                      |                    |         |
| Genotype                            |                                           |                    |         |                                      |                    |         |
| GG                                  | 84.1%                                     | 1.00 (reference)   | ---     | 17.2%                                | 1.00 (reference)   | ---     |
| GT                                  | 15.1%                                     | 1.37 (1.22 - 1.54) | 1.0E-7  | 48.1%                                | 1.59 (1.26 - 2.01) | 9.5E-5  |
| TT                                  | 0.7%                                      | 1.38 (0.84 - 2.30) | 0.21    | 34.7%                                | 2.09 (1.63 - 2.68) | 5.1E-9  |
| Additive                            |                                           | 1.34 (1.20 - 1.49) | 1.1E-7  |                                      | 1.43 (1.26 - 1.61) | 9.7E-9  |
| Dominant                            | MAF: 8.3%                                 | 1.37 (1.22 - 1.53) | 5.7E-8  | MAF: 41.3%                           | 1.78 (1.43 - 2.22) | 2.8E-7  |
| Recessive                           |                                           | 1.31 (0.80 - 2.17) | 0.28    |                                      | 1.49 (1.25 - 1.78) | 1.4E-5  |
| <i>SNCA</i> rs2583988 <sup>1</sup>  |                                           |                    |         |                                      |                    |         |
| Genotype                            |                                           |                    |         |                                      |                    |         |
| CC                                  | 51.4%                                     | 1.00 (reference)   | ---     | ---                                  | ---                | ---     |
| CT                                  | 39.5%                                     | 1.22 (1.12 - 1.33) | 7.70E-6 | ---                                  | ---                | ---     |
| TT                                  | 9.1%                                      | 1.43 (1.24 - 1.67) | 2.20E-6 | ---                                  | ---                | ---     |
| Additive                            |                                           | 1.21 (1.13 - 1.28) | 5.9E-9  | ---                                  | ---                | ---     |
| Dominant                            | MAF: 28.8%                                | 1.25 (1.16 - 1.36) | 5.0E-8  | ---                                  | ---                | ---     |
| Recessive                           |                                           | 1.32 (1.14 - 1.52) | 1E-4    | ---                                  | ---                | ---     |
| <i>MAPT</i> rs1052553               |                                           |                    |         |                                      |                    |         |
| Genotype <sup>2</sup>               |                                           |                    |         |                                      |                    |         |
| GG                                  | 4.2%                                      | 1.00 (reference)   | ---     | ---                                  | ---                | ---     |
| GA                                  | 29.5%                                     | 1.21 (0.98 - 1.49) | 0.077   | ---                                  | ---                | ---     |
| AA                                  | 66.3%                                     | 1.49 (1.22 - 1.82) | 0.00012 | ---                                  | ---                | ---     |
| Additive                            |                                           | 1.23 (1.14 - 1.32) | 2.2E-8  | ---                                  | ---                | ---     |
| Dominant                            | MAF: 18.9%                                | 1.39 (1.14 - 1.70) | 0.0012  | ---                                  | ---                | ---     |
| Recessive                           |                                           | 1.26 (1.16 - 1.37) | 1.09E-7 | ---                                  | ---                | ---     |
| <i>LRRK2</i> p.R1398H               |                                           |                    |         |                                      |                    |         |
| Dominant                            | MAF: 6.7%                                 |                    |         | MAF: 11.5%                           |                    |         |
| GG                                  | 87.1%                                     | 1.00 (reference)   | ---     | 78.4%                                | 1.00 (reference)   | ---     |
| GA/AA                               | 12.5%                                     | 0.87 (0.78 - 0.99) | 0.028   | 21.6%                                | 0.73 (0.60 - 0.90) | 0.0026  |

ORs and p-values result from fixed-effects logistic regression models adjusted for site. For genotype models, ORs and p-values are given in comparison to the reference category of homozygotes of the major allele (*SNCA*, *LRRK2*) or minor allele (*MAPT*). For additive models, ORs and p-values correspond to an additional minor allele (*SNCA*, *LRRK2*) or major allele (*MAPT*). For dominant models, ORs and p-values correspond to presence of the minor allele (*SNCA*, *LRRK2*) or major allele (*MAPT*). For recessive models, ORs and p-values correspond to presence of two copies of the minor allele (*SNCA*, *LRRK2*) or major allele (*MAPT*). <sup>1</sup>The minor allele differed between the Caucasian and Asian series' for *SNCA* rs356219 and rs11931074; for easier interpretation of results, odds ratio estimates for these two *SNCA* variants correspond to the minor allele in the overall patient-control series of Caucasian and Asian individuals (rs356219: G; rs11931074: T), which is the major allele in the smaller Asian series. <sup>2</sup>The A allele for *MAPT* rs1052553 corresponds to the H1 haplotype. OR=odds ratio. CI=confidence interval. MAF=minor allele frequency. --- indicates a variant observed at a frequency too low in the given series to allow for association analysis.

**Supplementary Table 5: Interactions of LRRK2 p.R1398H with *SNCA* and *MAPT* variants in regard to susceptibility to PD in the Caucasian series under a dominant model**

| Variant/Genotype                   | LRRK2 p.R1398H | Sample genotype count and frequency | Test of association |         |                                           |
|------------------------------------|----------------|-------------------------------------|---------------------|---------|-------------------------------------------|
|                                    |                |                                     | OR (95% CI)         | P-value | Test of interaction                       |
| <i>SNCA</i> rs181489               |                |                                     |                     |         |                                           |
| CC                                 | GG             | 3908 (39.9%)                        | 1.00 (reference)    | N/A     | OR: 1.13<br>95% CI: 0.88 - 1.44<br>P=0.33 |
| CC                                 | GA or AA       | 599 (6.1%)                          | 0.82 (0.69 - 0.98)  | 0.030   |                                           |
| CT or TT                           | GG             | 4603 (47.0%)                        | 1.23 (1.12 - 1.34)  | 6.3E-06 |                                           |
| CT or TT                           | GA or AA       | 678 (6.9%)                          | 1.14 (0.96 - 1.35)  | 0.13    |                                           |
| <i>SNCA</i> rs356219               |                |                                     |                     |         |                                           |
| AA                                 | GG             | 3087 (30.9%)                        | 1.00 (reference)    | N/A     | OR: 1.09<br>95% CI: 0.85 - 1.41<br>P=0.49 |
| AA                                 | GA or AA       | 440 (4.4%)                          | 0.82 (0.67 - 1.01)  | 0.060   |                                           |
| AG or GG                           | GG             | 5618 (56.2%)                        | 1.23 (1.12 - 1.35)  | 9.0E-06 |                                           |
| AG or GG                           | GA or AA       | 847 (8.5%)                          | 1.10 (0.94 - 1.29)  | 0.22    |                                           |
| <i>SNCA</i> rs11931074             |                |                                     |                     |         |                                           |
| GG                                 | GG             | 7443 (73.6%)                        | 1.00 (reference)    | N/A     | OR: 1.12<br>95% CI: 0.81 - 1.54<br>P=0.50 |
| GG                                 | GA or AA       | 1061 (10.5%)                        | 0.85 (0.74 - 0.97)  | 0.017   |                                           |
| GT or TT                           | GG             | 1359 (13.4%)                        | 1.34 (1.18 - 1.52)  | 3.4E-06 |                                           |
| GT or TT                           | GA or AA       | 244 (2.4%)                          | 1.27 (0.97 - 1.67)  | 0.080   |                                           |
| <i>SNCA</i> rs2583988              |                |                                     |                     |         |                                           |
| CC                                 | GG             | 4495 (44.6%)                        | 1.00 (reference)    | N/A     | OR: 1.13<br>95% CI: 0.89 - 1.44<br>P=0.32 |
| CC                                 | GA or AA       | 677 (6.7%)                          | 0.82 (0.69 - 0.97)  | 0.019   |                                           |
| CT or TT                           | GG             | 4280 (42.5%)                        | 1.24 (1.13 - 1.35)  | 2.2E-06 |                                           |
| CT or TT                           | GA or AA       | 617 (6.1%)                          | 1.14 (0.96 - 1.36)  | 0.13    |                                           |
| <i>MAPT</i> rs1052553 <sup>1</sup> |                |                                     |                     |         |                                           |
| GG                                 | GG             | 364 (3.6%)                          | 1.00 (reference)    | N/A     | OR: 1.65<br>95% CI: 0.91 - 3.05<br>P=0.10 |
| GG                                 | GA or AA       | 58 (0.6%)                           | 0.54 (0.03 - 0.97)  | 0.040   |                                           |
| GA or AA                           | GG             | 8498 (83.5%)                        | 1.27 (1.02 - 1.58)  | 0.029   |                                           |
| GA or AA                           | GA or AA       | 1256 (12.3%)                        | 1.14 (0.89 - 1.45)  | 0.29    |                                           |

ORs and p-values result from fixed-effects logistic regression models. For tests of association, the two given variants were combined into one variable, and the model was adjusted for site. For tests of interaction, models were adjusted for each of the two variants, their interaction, and site. Dominant models refer to the characterization of *SNCA* and *MAPT* variants; only dominant models were considered for LRRK2 p.R1398H due to the small number of rare homozygotes for this variant. Interaction ORs under a dominant model are interpreted as the multiplicative increase in the effect of the minor allele for LRRK2 p.R1398H on PD corresponding to presence of the risk allele for *SNCA* and *MAPT* variants, or alternatively as the multiplicative increase in the effect of presence of the risk allele for *SNCA* and *MAPT* variants on PD corresponding to presence of the minor allele for LRRK2 p.R1398H. OR=odds ratio. CI=confidence interval. <sup>1</sup>The A allele for *MAPT* rs1052553 corresponds to the H1 haplotype.

**Supplementary Table 6: Interactions of LRRK2 p.R1398H with *SNCA* and *MAPT* variants in regard to susceptibility to PD in the Caucasian series under a recessive model**

| Variant/Genotype                   | LRRK2 p.R1398H | Sample genotype count and frequency | Test of association |          |                            |
|------------------------------------|----------------|-------------------------------------|---------------------|----------|----------------------------|
|                                    |                |                                     | OR (95% CI)         | P-value  | Test of interaction        |
| <i>SNCA</i> rs181489               |                |                                     |                     |          |                            |
| CC or CT                           | GG             | 7544 (77.1%)                        | 1.00 (reference)    | N/A      |                            |
| CC or CT                           | GA or AA       | 1141 (11.7%)                        | 0.88 (0.77 - 1.00)  | 0.051    | OR: 0.96                   |
| TT                                 | GG             | 967 (9.9%)                          | 1.55 (1.34 - 1.79)  | 4.0E-9   | 95% CI: 0.65 - 1.44 P=0.86 |
| TT                                 | GA or AA       | 136 (1.4%)                          | 1.31 (0.93 - 1.88)  | 0.13     |                            |
| <i>SNCA</i> rs356219               |                |                                     |                     |          |                            |
| AA or AG                           | GG             | 7229 (72.3%)                        | 1.00 (reference)    | N/A      |                            |
| AA or AG                           | GA or AA       | 1068 (10.7%)                        | 0.90 (0.79 - 1.03)  | 0.14     | OR: 0.80                   |
| GG                                 | GG             | 1476 (14.8%)                        | 1.40 (1.24 - 1.58)  | 3.5E-8   | 95% CI: 0.58 - 1.11 P=0.18 |
| GG                                 | GA or AA       | 219 (2.2%)                          | 1.02 (0.77 - 1.34)  | 0.91     |                            |
| <i>SNCA</i> rs11931074             |                |                                     |                     |          |                            |
| GG or GT                           | GG             | 8743 (86.5%)                        | 1.00 (reference)    | N/A      |                            |
| GG or GT                           | GA or AA       | 1293 (12.8%)                        | 0.88 (0.78 - 0.99)  | 0.039    | OR: 0.52                   |
| TT                                 | GG             | 59 (0.6%)                           | 1.41 (0.81 - 2.52)  | 0.24     | 95% CI: 0.14 - 1.96        |
| TT                                 | GA or AA       | 12 (0.1%)                           | 0.64 (0.19 - 2.14)  | 0.46     | P=0.33                     |
| <i>SNCA</i> rs2583988              |                |                                     |                     |          |                            |
| CC or CT                           | GG             | 7975 (79.2%)                        | 1.00 (reference)    | N/A      |                            |
| CC or CT                           | GA or AA       | 1177 (11.7%)                        | 0.87 (0.76 - 0.98)  | 0.027    | OR: 0.99                   |
| TT                                 | GG             | 800 (7.9%)                          | 1.31 (1.13 - 1.54)  | 0.0006   | 95% CI: 0.65 - 1.52 P=0.97 |
| TT                                 | GA or AA       | 117 (1.2%)                          | 1.13 (0.78 - 1.66)  | 0.53     |                            |
| <i>MAPT</i> rs1052553 <sup>1</sup> |                |                                     |                     |          |                            |
| GG or GA                           | GG             | 2981 (29.3%)                        | 1.00 (reference)    | N/A      | OR: 0.98                   |
| GG or GA                           | GA or AA       | 456 (4.5%)                          | 0.89 (0.72 - 1.09)  | 0.25     | 95% CI: 0.76 - 1.26        |
| AA                                 | GG             | 5881 (57.8%)                        | 1.25 (1.14 - 1.38)  | 1.55E-06 | P=0.88                     |
| AA                                 | GA or AA       | 858 (8.4%)                          | 1.09 (0.93 - 1.28)  | 0.28     |                            |

ORs and p-values result from fixed-effects logistic regression models. For tests of association, the two given variants were combined into one variable, and the model was adjusted for site. For tests of interaction, models were adjusted for each of the two variants, their interaction, and site. Recessive models refer to the characterization of *SNCA* and *MAPT* variants; only dominant models were considered for LRRK2 p.R1398H due to the small number of rare homozygotes for this variant. Interaction ORs under a recessive model are interpreted as the multiplicative increase in the effect of the minor allele for LRRK2 p.R1398H on PD corresponding to presence of two risk alleles for *SNCA* and *MAPT* variants, or alternatively as the multiplicative increase in the effect presence of two risk alleles for *SNCA* and *MAPT* variants on PD corresponding to presence of the minor allele for LRRK2 p.R1398H. OR=odds ratio. CI=confidence interval. <sup>1</sup>The A allele for *MAPT* rs1052553 corresponds to the H1 haplotype.

**Supplementary Table 7: Interactions of LRRK2 p.R1398H with SNCA and MAPT variants in regard to susceptibility to PD when adjusting for age and gender in addition to site.**

| Interaction between LRRK2 p.R1398H and: | Caucasian series        |         | Asian series            |         |
|-----------------------------------------|-------------------------|---------|-------------------------|---------|
|                                         | Interaction OR (95% CI) | P-value | Interaction OR (95% CI) | P-value |
| <i>SNCA</i> rs181489                    |                         |         |                         |         |
| Additive model                          | 1.06 (0.88 – 1.28)      | 0.54    | ---                     | ---     |
| Dominant model                          | 1.12 (0.87 – 1.44)      | 0.36    | ---                     | ---     |
| Recessive model                         | 0.97 (0.65 – 1.46)      | 0.88    | ---                     | ---     |
| Genotype model <sup>1</sup>             | NA                      | 0.12    | ---                     | ---     |
| <i>SNCA</i> rs356219                    |                         |         |                         |         |
| Additive model                          | 0.96 (0.80 – 1.15)      | 0.64    | 0.94 (0.65 – 1.33)      | 0.72    |
| Dominant model                          | 1.06 (0.82 – 1.38)      | 0.64    | 0.95 (0.56 – 1.59)      | 0.84    |
| Recessive model                         | 0.78 (0.56 – 1.09)      | 0.14    | 0.90 (0.47 – 1.72)      | 0.76    |
| Genotype model <sup>1</sup>             | NA                      | 0.34    | NA                      | 0.96    |
| <i>SNCA</i> rs11931074                  |                         |         |                         |         |
| Additive model                          | 1.03 (0.76 – 1.39)      | 0.87    | 0.89 (0.63 – 1.26)      | 0.52    |
| Dominant model                          | 1.08 (0.78 – 1.50)      | 0.64    | 0.84 (0.50 – 1.41)      | 0.52    |
| Recessive model                         | 0.49 (0.13 – 1.82)      | 0.28    | 0.91 (0.49 – 1.70)      | 0.78    |
| Genotype model <sup>1</sup>             | NA                      | 0.60    | NA                      | 0.93    |
| <i>SNCA</i> rs2583988                   |                         |         |                         |         |
| Additive model                          | 1.07 (0.88 – 1.29)      | 0.51    | ---                     | ---     |
| Dominant model                          | 1.10 (0.86 – 1.42)      | 0.43    | ---                     | ---     |
| Recessive model                         | 1.04 (0.67 – 1.60)      | 0.87    | ---                     | ---     |
| Genotype model <sup>1</sup>             | NA                      | 0.66    | ---                     | ---     |
| <i>MAPT</i> rs1052553                   |                         |         |                         |         |
| Additive model                          | 1.04 (0.84 – 1.29)      | 0.74    | ---                     | ---     |
| Dominant model                          | 1.67 (0.91 – 3.11)      | 0.10    | ---                     | ---     |
| Recessive model                         | 0.96 (0.74 – 1.25)      | 0.77    | ---                     | ---     |
| Genotype model <sup>1</sup>             | NA                      | 0.34    | ---                     | ---     |

ORs, 95% CIs, and p-values result from fixed-effects logistic regression models adjusted for age, gender, and site. OR=odds ratio. CI=confidence interval. --- indicates a variant observed at a frequency too low in the given series to allow for association analysis.

<sup>1</sup>Tests of interaction under a genotype model do not produce a single interaction OR, and therefore only a p-value is given.

**Supplementary Table 8: Interactions of LRRK2 p.R1398H with *SNCA* and *MAPT* variants in regard to susceptibility to PD utilizing a random effects model, and tests for heterogeneity of interaction effects between sites**

|                                         | Caucasian series (5991 PD, 4331 controls)                   |         |                                     |         | Asian series (1351 PD, 938 controls)                        |         |                                     |         |
|-----------------------------------------|-------------------------------------------------------------|---------|-------------------------------------|---------|-------------------------------------------------------------|---------|-------------------------------------|---------|
|                                         | Evaluation of between-site heterogeneity in interaction ORs |         | Evaluation of gene-gene interaction |         | Evaluation of between-site heterogeneity in interaction ORs |         | Evaluation of gene-gene interaction |         |
| Interaction between LRRK2 p.R1398H and: | I <sup>2</sup> (95% CI) <sup>1</sup>                        | P-value | Interaction OR (95% CI)             | P-value | I <sup>2</sup> (95% CI) <sup>1</sup>                        | P-value | Interaction OR (95% CI)             | P-value |
| <i>SNCA</i> rs181489                    |                                                             |         |                                     |         |                                                             |         |                                     |         |
| Additive model                          | 25% (0% – 59%)                                              | 0.18    | 1.07 (0.84 – 1.34)                  | 0.59    | ---                                                         | ---     | ---                                 | ---     |
| Dominant model                          | 31% (0% - 62%)                                              | 0.11    | 1.15 (0.83 – 1.58)                  | 0.40    | ---                                                         | ---     | ---                                 | ---     |
| <i>SNCA</i> rs356219                    |                                                             |         |                                     |         |                                                             |         |                                     |         |
| Additive model                          | 0% (0% - 47%)                                               | 0.57    | 0.98 (0.82 – 1.17)                  | 0.83    | 50% (0% - 84%)                                              | 0.11    | 1.03 (0.64 – 1.67)                  | 0.89    |
| Dominant model <sup>2</sup>             | 0% (0% - 52%)                                               | 0.45    | 1.11 (0.85 – 1.44)                  | 0.45    | 55% (0% - 85%)                                              | 0.084   | 1.02 (0.49 – 2.10)                  | 0.96    |
| <i>SNCA</i> rs11931074                  |                                                             |         |                                     |         |                                                             |         |                                     |         |
| Additive model                          | 0% (0% - 24%)                                               | 0.86    | 0.91 (0.66 – 1.25)                  | 0.56    | 48% (0% - 83%)                                              | 0.12    | 1.13 (0.72 – 1.77)                  | 0.60    |
| Dominant model <sup>2</sup>             | 0% (0% - 15%)                                               | 0.90    | 0.97 (0.70 – 1.36)                  | 0.88    | 46% (0% - 82%)                                              | 0.14    | 1.22 (0.64 – 2.34)                  | 0.54    |
| <i>SNCA</i> rs2583988                   |                                                             |         |                                     |         |                                                             |         |                                     |         |
| Additive model                          | 0% (0% - 42%)                                               | 0.68    | 1.07 (0.88 – 1.29)                  | 0.50    | ---                                                         | ---     | ---                                 | ---     |
| Dominant model                          | 0% (0% - 22%)                                               | 0.87    | 1.14 (0.88 – 1.46)                  | 0.32    | ---                                                         | ---     | ---                                 | ---     |
| <i>MAPT</i> rs1052553                   |                                                             |         |                                     |         |                                                             |         |                                     |         |
| Additive model                          | 36% (0% - 65%)                                              | 0.075   | 1.01 (0.75 – 1.36)                  | 0.95    | ---                                                         | ---     | ---                                 | ---     |
| Recessive model <sup>3</sup>            | 30% (0% - 62%)                                              | 0.13    | 0.95 (0.69 – 1.33)                  | 0.78    | ---                                                         | ---     | ---                                 | ---     |

Interaction ORs and p-values result from random effects models. Heterogeneity p-values result from chi-square tests based on the Q statistic, where the test is for differences in interaction ORs between sites. <sup>1</sup>The I<sup>2</sup> statistic is a measure of the proportion of variation in interaction ORs between sites that is due to heterogeneity beyond chance [25] <sup>2</sup>The minor allele differed between the Caucasian and Asian series for *SNCA* rs356219 and rs11931074, although the risk allele was the same; in the Asian series, recessive models rather than dominant models were considered for these two variants due to the small number of homozygotes of the protective allele for individual sites in that series. <sup>3</sup>For *MAPT* rs1052553, a recessive model rather than a dominant model was considered due to the small number of homozygotes of the protective allele for individual sites. --- indicates a variant observed at a frequency too low in the given series to allow for association analysis.

**Supplementary Table 9: Interactions of LRRK2 p.R1398H with *SNCA* and *MAPT* variants in regard to susceptibility to PD in the Caucasian series, separately for each country**

| Country                     | Interaction between LRRK2 p.R1398H and: |          |                      |         |                      |         |                        |         |                       |         |                       |         |
|-----------------------------|-----------------------------------------|----------|----------------------|---------|----------------------|---------|------------------------|---------|-----------------------|---------|-----------------------|---------|
|                             | Sample size                             |          | <i>SNCA</i> rs181489 |         | <i>SNCA</i> rs356219 |         | <i>SNCA</i> rs11931074 |         | <i>SNCA</i> rs2583988 |         | <i>MAPT</i> rs1052553 |         |
|                             | Patients with PD                        | Controls | OR (95% CI)          | P-value | OR (95% CI)          | P-value | OR (95% CI)            | P-value | OR (95% CI)           | P-value | OR (95% CI)           | P-value |
| Additive model              |                                         |          |                      |         |                      |         |                        |         |                       |         |                       |         |
| Australia                   | 923                                     | 713      | 0.82 (0.52, 1.29)    | 0.39    | 0.93 (0.60, 1.44)    | 0.74    | 1.88 (0.88, 4.18)      | 0.11    | 0.96 (0.61, 1.51)     | 0.86    | 1.11 (0.68, 1.86)     | 0.68    |
| France                      | 548                                     | 143      | 0.56 (0.16, 1.89)    | 0.36    | 0.92 (0.28, 3.05)    | 0.90    | ---                    | ---     | 0.51 (0.17, 1.51)     | 0.22    | 0.27 (0.04, 1.02)     | 0.097   |
| Germany                     | 1074                                    | 675      | 1.33 (0.84, 2.10)    | 0.22    | 1.23 (0.80, 1.89)    | 0.35    | 0.79 (0.39, 1.62)      | 0.52    | 1.23 (0.79, 1.94)     | 0.37    | 1.50 (0.90, 2.54)     | 0.13    |
| Greece                      | 450                                     | 405      | 0.63 (0.29, 1.35)    | 0.24    | 0.62 (0.30, 1.77)    | 0.20    | 0.48 (0.09, 2.09)      | 0.34    | 1.05 (0.52, 2.15)     | 0.89    | 0.41 (0.16, 1.06)     | 0.069   |
| Ireland                     | 360                                     | 444      | 2.25 (1.18, 4.51)    | 0.012   | 0.72 (0.39, 1.29)    | 0.27    | 1.07 (0.31, 3.61)      | 0.91    | 1.85 (0.92, 3.88)     | 0.092   | 0.98 (0.46, 2.19)     | 0.96    |
| Italy                       | 469                                     | 365      | 0.82 (0.43, 1.61)    | 0.56    | 1.15 (0.61, 2.24)    | 0.67    | 1.49 (0.51, 4.75)      | 0.48    | 0.96 (0.48, 1.95)     | 0.90    | 1.72 (0.83, 3.73)     | 0.15    |
| Norway                      | 602                                     | 526      | 1.21 (0.75, 1.97)    | 0.43    | 1.26 (0.79, 2.01)    | 0.33    | 1.07 (0.52, 2.24)      | 0.85    | 1.30 (0.80, 2.13)     | 0.29    | 1.10 (0.62, 1.96)     | 0.75    |
| Poland                      | 349                                     | 340      | 1.12 (0.55, 2.33)    | 0.76    | 1.30 (0.63, 2.72)    | 0.48    | 1.01 (0.26, 4.04)      | 0.99    | 1.16 (0.59, 2.37)     | 0.67    | 0.88 (0.37, 2.04)     | 0.76    |
| Sweden                      | 91                                      | 180      | 0.63 (0.21, 1.69)    | 0.38    | 0.57 (0.20, 1.56)    | 0.28    | 0.50 (0.08, 2.55)      | 0.42    | 0.60 (0.17, 1.87)     | 0.40    | 0.47 (0.12, 1.92)     | 0.29    |
| United States               | 1,125                                   | 540      | 1.22 (0.75, 2.02)    | 0.43    | 0.91 (0.58, 1.44)    | 0.69    | 0.58 (0.28, 1.24)      | 0.15    | 0.96 (0.58, 1.61)     | 0.88    | 1.03 (0.60, 1.76)     | 0.93    |
| Overall Caucasian           | 5,991                                   | 4,331    | 1.06 (0.88, 1.28)    | 0.52    | 0.98 (0.82, 1.17)    | 0.81    | 1.06 (0.79, 1.43)      | 0.69    | 1.07 (0.89, 1.29)     | 0.47    | 1.05 (0.85, 1.30)     | 0.65    |
| Dominant model <sup>1</sup> |                                         |          |                      |         |                      |         |                        |         |                       |         |                       |         |
| Australia                   | 923                                     | 713      | 0.96 (0.52, 1.77)    | 0.89    | 1.31 (0.68, 2.58)    | 0.42    | 1.83 (0.83, 4.17)      | 0.14    | 1.00 (0.55, 1.82)     | 0.99    | 1.08 (0.58, 2.00)     | 0.81    |
| France                      | 548                                     | 143      | 0.67 (0.15, 2.61)    | 0.57    | 0.92 (0.17, 3.96)    | 0.91    | ---                    | ---     | 0.71 (0.18, 2.72)     | 0.62    | 0.24 (0.03, 1.09)     | 0.093   |
| Germany                     | 1074                                    | 675      | 1.34 (0.74, 2.42)    | 0.34    | 1.23 (0.67, 2.27)    | 0.50    | 0.97 (0.42, 2.27)      | 0.94    | 1.55 (0.87, 2.79)     | 0.14    | 1.26 (0.69, 2.30)     | 0.46    |
| Greece                      | 450                                     | 405      | 0.34 (0.12, 0.92)    | 0.034   | 0.36 (0.13, 0.96)    | 0.043   | 0.46 (0.09, 2.03)      | 0.32    | 0.86 (0.32, 2.27)     | 0.75    | 0.32 (0.11, 0.88)     | 0.028   |
| Ireland                     | 360                                     | 444      | 2.97 (1.19, 7.80)    | 0.022   | 0.81 (0.32, 2.11)    | 0.66    | 0.98 (0.28, 3.32)      | 0.97    | 1.76 (0.69, 4.64)     | 0.24    | 0.92 (0.38, 2.31)     | 0.85    |
| Italy                       | 469                                     | 365      | 1.02 (0.43, 2.45)    | 0.96    | 1.32 (0.54, 3.28)    | 0.54    | 1.44 (0.46, 4.88)      | 0.54    | 1.05 (0.44, 2.53)     | 0.91    | 1.78 (0.74, 4.33)     | 0.20    |
| Norway                      | 602                                     | 526      | 1.25 (0.66, 2.38)    | 0.50    | 1.55 (0.78, 3.06)    | 0.21    | 1.16 (0.55, 2.52)      | 0.70    | 1.18 (0.62, 2.25)     | 0.60    | 1.17 (0.59, 2.33)     | 0.65    |
| Poland                      | 349                                     | 340      | 1.71 (0.66, 4.52)    | 0.27    | 2.03 (0.75, 5.69)    | 0.17    | 0.95 (0.24, 3.86)      | 0.94    | 1.67 (0.66, 4.35)     | 0.29    | 0.96 (0.33, 2.78)     | 0.94    |
| Sweden                      | 91                                      | 180      | 0.69 (0.16, 2.83)    | 0.61    | 0.84 (0.19, 4.07)    | 0.82    | 0.50 (0.08, 2.55)      | 0.42    | 0.61 (0.14, 2.51)     | 0.50    | 0.58 (0.12, 2.96)     | 0.50    |
| United States               | 1,125                                   | 540      | 1.26 (0.66, 2.40)    | 0.48    | 0.88 (0.45, 1.68)    | 0.69    | 0.66 (0.30, 1.49)      | 0.31    | 1.02 (0.54, 1.95)     | 0.95    | 0.88 (0.46, 1.69)     | 0.70    |
| Overall Caucasian           | 5,991                                   | 4,331    | 1.13 (0.88, 1.44)    | 0.33    | 1.09 (0.85, 1.41)    | 0.49    | 1.12 (0.81, 1.54)      | 0.50    | 1.13 (0.89, 1.44)     | 0.32    | 0.98 (0.76, 1.26)     | 0.88    |

ORs and p-values result from fixed-effects logistic regression models adjusted for each of the two variants, their interaction, and site for countries with more than one site. Interaction ORs under an additive model are interpreted as the multiplicative increase in the effect of the minor allele for LRRK2 p.R1398H on PD corresponding to each additional risk allele for *SNCA* and *MAPT* variants, or alternatively as the as the multiplicative increase in the effect of each additional risk allele for *SNCA* and *MAPT* variants on PD corresponding to presence of the minor allele for LRRK2 p.R1398H. Interaction ORs under a dominant model are interpreted as the multiplicative increase in the effect of the minor allele for LRRK2 p.R1398H on PD corresponding to presence of the risk allele for *SNCA* and *MAPT* variants, or alternatively as the as the multiplicative increase in the effect of presence of the risk allele for *SNCA* and *MAPT* variants on PD corresponding to presence of the minor allele for LRRK2 p.R1398H. <sup>1</sup>Models for *MAPT* rs1052553 are recessive models rather than dominant models due to the small number of homozygotes of the minor allele for this variant in individual sites; the minor allele was the reference allele for *MAPT* rs1052553, and therefore a recessive model compares homozygotes of the major (risk) allele with the other two genotypes. OR=odds ratio. CI=confidence interval. --- indicates a country where the risk allele was not present in either patients with PD or controls.

**Supplementary Table 10: Three-way interactions between LRRK2 p.R1398H, SNCA variants, and MAPT rs1052553 in regard to susceptibility to PD in the Caucasian series**

| SNCA Variant/Genotype  | MAPT rs1052553 genotype <sup>1</sup> | LRRK2 p.R1398H genotype | Sample genotype count and frequency | Test of association |         |                     |
|------------------------|--------------------------------------|-------------------------|-------------------------------------|---------------------|---------|---------------------|
|                        |                                      |                         |                                     | OR (95% CI)         | P-value | Test of interaction |
| <i>SNCA</i> rs181489   |                                      |                         |                                     |                     |         |                     |
| CC                     | GG or GA                             | GG                      | 1335 (13.6%)                        | 1.00 (reference)    | N/A     |                     |
| CC                     | GG or GA                             | GA or AA                | 214 (2.2%)                          | 0.81 (0.60 - 1.09)  | 0.17    |                     |
| CC                     | AA                                   | GG                      | 2573 (26.3%)                        | 1.19 (1.04 - 1.37)  | 0.011   |                     |
| CC                     | AA                                   | GA or AA                | 385 (3.9%)                          | 0.99 (0.78 - 1.26)  | 0.95    |                     |
| CT or TT               | GG or GA                             | GG                      | 1528 (15.6%)                        | 1.16 (1.00 - 1.35)  | 0.053   | P=0.80              |
| CT or TT               | GG or GA                             | GA or AA                | 231 (2.4%)                          | 1.11 (0.83 - 1.48)  | 0.48    |                     |
| CT or TT               | AA                                   | GG                      | 3075 (31.4%)                        | 1.51 (1.32 - 1.72)  | 2.3E-9  |                     |
| CT or TT               | AA                                   | GA or AA                | 447 (4.6%)                          | 1.38 (1.10 - 1.72)  | 0.0051  |                     |
| <i>SNCA</i> rs356219   |                                      |                         |                                     |                     |         |                     |
| AA                     | GG or GA                             | GG                      | 1066 (10.7%)                        | 1.00 (reference)    | N/A     |                     |
| AA                     | GG or GA                             | GA or AA                | 156 (1.6%)                          | 0.86 (0.61 - 1.22)  | 0.41    |                     |
| AA                     | AA                                   | GG                      | 2021 (20.2%)                        | 1.26 (1.08 - 1.47)  | 0.0038  |                     |
| AA                     | AA                                   | GA or AA                | 284 (2.8%)                          | 1.00 (0.77 - 1.32)  | 0.97    |                     |
| AG or GG               | GG or GA                             | GG                      | 1846 (18.5%)                        | 1.23 (1.05 - 1.43)  | 0.011   | P=0.96              |
| AG or GG               | GG or GA                             | GA or AA                | 290 (2.9%)                          | 1.11 (0.85 - 1.46)  | 0.43    |                     |
| AG or GG               | AA                                   | GG                      | 3772 (37.8%)                        | 1.54 (1.34 - 1.78)  | 2.2E-9  |                     |
| AG or GG               | AA                                   | GA or AA                | 557 (5.6%)                          | 1.38 (1.11 - 1.71)  | 0.0032  |                     |
| <i>SNCA</i> rs11931074 |                                      |                         |                                     |                     |         |                     |
| GG                     | GG or GA                             | GG                      | 2517 (24.9%)                        | 1.00 (reference)    | N/A     |                     |
| GG                     | GG or GA                             | GA or AA                | 371 (3.7%)                          | 0.88 (0.70 - 1.10)  | 0.27    |                     |
| GG                     | AA                                   | GG                      | 4926 (48.7%)                        | 1.26 (1.14 - 1.40)  | 4.7E-6  |                     |
| GG                     | AA                                   | GA or AA                | 690 (6.8%)                          | 1.06 (0.89 - 1.26)  | 0.52    |                     |
| GT or TT               | GG or GA                             | GG                      | 446 (4.4%)                          | 1.43 (1.16 - 1.77)  | 0.0009  | P=0.88              |
| GT or TT               | GG or GA                             | GA or AA                | 81 (0.8%)                           | 1.22 (0.77 - 1.94)  | 0.40    |                     |
| GT or TT               | AA                                   | GG                      | 913 (9.0%)                          | 1.64 (1.39 - 1.93)  | 2.8E-9  |                     |
| GT or TT               | AA                                   | GA or AA                | 163 (1.6%)                          | 1.65 (1.18 - 2.33)  | 0.0039  |                     |
| <i>SNCA</i> rs2583988  |                                      |                         |                                     |                     |         |                     |
| CC                     | GG or GA                             | GG                      | 1526 (15.2%)                        | 1.00 (reference)    | N/A     |                     |
| CC                     | GG or GA                             | GA or AA                | 251 (2.5%)                          | 0.81 (0.62 - 1.07)  | 0.14    |                     |
| CC                     | AA                                   | GG                      | 2969 (29.5%)                        | 1.18 (1.04 - 1.35)  | 0.0095  |                     |
| CC                     | AA                                   | GA or AA                | 426 (4.2%)                          | 0.98 (0.79 - 1.23)  | 0.88    |                     |
| CT or TT               | GG or GA                             | GG                      | 1426 (14.2%)                        | 1.15 (0.99 - 1.34)  | 0.068   | P=0.63              |
| CT or TT               | GG or GA                             | GA or AA                | 199 (2.0%)                          | 1.20 (0.88 - 1.63)  | 0.25    |                     |
| CT or TT               | AA                                   | GG                      | 2854 (28.3%)                        | 1.52 (1.33 - 1.73)  | 3.2E-10 |                     |
| CT or TT               | AA                                   | GA or AA                | 418 (4.2%)                          | 1.32 (1.06 - 1.66)  | 0.015   |                     |

ORs and p-values result from fixed-effects logistic regression models. For tests of association, the three given variants were combined into one variable, and the model was adjusted for site. For tests of interaction, the fixed-effects logistic regression model was adjusted for site, and the p-value given tested for any interaction (pair-wise or three-way) between the three given variants. Rare homozygotes were collapsed with heterozygotes in order to avoid extremely rare three-variant genotype combinations. <sup>1</sup>The A allele for *MAPT* rs1052553 corresponds to the H1 haplotype. OR=odds ratio. CI=confidence interval.



**Supplementary Table 11: Interactions of LRRK2 p.R1398H with SNCA and MAPT variants in regard to susceptibility to PD in the Asian series, separately for each country**

| Country                      | Patients with PD | Controls | Interaction between LRRK2 p.R1398H and: |         |                   |         |
|------------------------------|------------------|----------|-----------------------------------------|---------|-------------------|---------|
|                              |                  |          | SNCA rs356219                           |         | SNCA rs11931074   |         |
|                              |                  |          | OR (95% CI)                             | P-value | OR (95% CI)       | P-value |
| Additive model               |                  |          |                                         |         |                   |         |
| Japan                        | 171              | 90       | 0.45 (0.15, 1.24)                       | 0.13    | 0.47 (0.18, 1.20) | 0.12    |
| Korea                        | 811              | 550      | 1.24 (0.85, 1.82)                       | 0.27    | 1.34 (0.92, 1.96) | 0.13    |
| Taiwan                       | 369              | 298      | 1.41 (0.77, 2.62)                       | 0.27    | 1.50 (0.84, 2.76) | 0.18    |
| Overall Asian                | 1,351            | 938      | 1.17 (0.87, 1.59)                       | 0.30    | 1.25 (0.93, 1.69) | 0.14    |
| Recessive model <sup>1</sup> |                  |          |                                         |         |                   |         |
| Japan                        | 171              | 90       | 0.25 (0.06, 1.04)                       | 0.056   | 0.30 (0.08, 1.19) | 0.084   |
| Korea                        | 811              | 550      | 1.42 (0.81, 2.51)                       | 0.22    | 1.61 (0.92, 2.83) | 0.096   |
| Taiwan                       | 369              | 298      | 1.58 (0.65, 3.94)                       | 0.32    | 1.73 (0.73, 4.17) | 0.21    |
| Overall Asian                | 1,351            | 938      | 1.22 (0.78, 1.92)                       | 0.38    | 1.39 (0.90, 2.17) | 0.14    |

ORs and p-values result from fixed-effects logistic regression models adjusted for each of the two variants, their interaction, and site for countries with more than one site. Interaction ORs under an additive model are interpreted as the multiplicative increase in the effect of the minor allele for LRRK2 p.R1398H on PD corresponding to each additional risk allele for SNCA variants, or alternatively as the as the multiplicative increase in the effect of each additional risk allele for SNCA variants on PD corresponding to presence of the minor allele for LRRK2 p.R1398H. Interaction ORs under a recessive model are interpreted as the multiplicative increase in the effect of the minor allele for LRRK2 p.R1398H on PD corresponding to presence of two risk alleles for SNCA variants, or alternatively as the as the multiplicative increase in the effect of presence of two risk alleles for SNCA variants on PD corresponding to presence of the minor allele for LRRK2 p.R1398H. <sup>1</sup>Recessive models rather than dominant models are displayed in the Asian series due to the small number of homozygotes of the protective allele for SNCA variants in that series; in the Asian series, recessive models for SNCA variants compare homozygotes of the major (risk) allele with the other two genotypes. OR=odds ratio. CI=confidence interval.

## Supplementary Text: Genetic Epidemiology of Parkinson's Disease (GEO-PD) Consortium

The members of the GEO-PD Consortium include:

- 1) Executive Directors:
  - a. Medical Director: Demetrius M. Maraganore (NorthShore University HealthSystem, Chicago, IL)
  - b. Scientific Director: Matthew J. Farrer (University of British Columbia, Vancouver, BC, Canada)
  
- 2) Core Directors:
  - a. Clinical Core: Demetrius M. Maraganore (NorthShore University HealthSystem, Chicago, IL); Jan O. Aasly (University of Trondheim, Trondheim, Norway)
  - b. Genotyping Core: Matthew J. Farrer (University of British Columbia, Vancouver, BC, Canada); Rejko Krüger (University of Tübingen, Tübingen, Germany)
  - c. Statistical Core: Alexis Elbaz (Institut national de la santé et de la recherche médicale and University Paris-Sud 11); John P. Ioannidis (Stanford University, Palo Alto, CA, USA)
  
- 3) Global Site Principal Investigators:
 

Jan O. Aasly (University of Trondheim, Trondheim, Norway)

Grazie Annesi (National Research Council, Cosenza, Italy)

Annarita Bentivoglio (Università Cattolica del Sacro Cuore, Rome, Italy)

Maria Bozi (General Hospital of Syros, Syros, Greece)

Alexis Brice (Universite Pierre et Marie Curie, Paris, France)

Andrea Carmine-Belin (Karolinska Institutet, Stockholm, Sweden)

Jonathan Carr (University of Stellenbosch, Cape Town, South Africa)

Camille Carroll (Plymouth University Peninsula Schools of Medicine and Dentistry, England)

Bruce Chase (University of Nebraska, Omaha, Nebraska, USA)

Harvey Checkoway (University of Washington, Seattle, Washington, USA)

Sheng-Di Chen (Ruijin Hospital and Shanghai Jiao Tong University School of Medicine, Shanghai, China)

Sun Ju Chung (Asan Medical Center, Seoul, Korea)

Carlos Cosentino (Instituto de Ciencias Neurologicas, Lima, Peru)

Silke Cresswell (University of British Columbia, BC, Canada)

Angela Deutschlaender (Max-Planck Institute of Psychiatry, Munich, Germany)

Alexis Elbaz (Institut national de la santé et de la recherche médicale and University Paris-Sud 11)

Carlo Ferrarese (University of Milano-Bicocca, Monza, Italy)

Tatiana Foroud (Indiana University, Indianapolis, IN, USA)

Gaëtan Garraux (University Hospital of Liege, Belgium)

Stefano Goldwurm (Parkinson Institute, Milan, Italy)

George Hadjigeorgiou (University of Thessaly, Larissa, Greece)

Nobutaka Hattori (Juntendo University, Tokyo, Japan)

Beom Seok Jeon (Seoul National Hospital, Seoul, Korea)

Hideshi Kawakami (University of Hiroshima, Hiroshima, Japan)  
Yun Joong Kim (Hallym University, Anyang, Kyonggi-do, Korea)  
Asha Kishore (Sree Chitra Tirunal Institute for Medical Sciences and Technology, Trivandrum, Kerala, India)  
Christine Klein (University of Luebeck, Luebeck, Germany)  
Dimitri Krainc (Northwestern University, Chicago, IL USA)  
Rejko Krüger (University of Tübingen, Tübingen, Germany)  
Anna Krygowska-Wajs (Collegium Medicum, Jagiellonian University, Krakow, Poland)  
Luis Lay-Son (University of Santiago de Chile, Santiago, Chile)  
Jeui-Jueng Lin (Chushagn Show-Chwan Hospital, Nantou, Taiwan)  
Demetrius M. Maraganore (NorthShore University HealthSystem, Evanston, IL, USA)  
George Mellick (Griffith University, Nathan, Queensland, Australia)  
Karen E. Morrison (University of Birmingham, UK)  
Renato P. Munhoz (Paraná Parkinson's Disease Foundation, Curitiba/PR, Brazil)  
Njide U. Okubadejo (University of Lagos, Lagos, Nigeria)  
Grzegorz Opala (Medical University of Silesia, Katowice, Poland)  
Pao Pastor (University of Navarra School of Medicine, Pamplona, Spain)  
Haydeh Payami (Wadsworth Center, Albany, New York)  
Sofya N. Pchelina (Pavlov State Medical University of Saint Petersburg, Saint Petersburg, Russia)  
Maria Skaalum Petersen (The Faroese Hospital System, Faroe Islands)  
Andrea Puschmann (Skane University Hospital, Lund, Sweden)  
Beate Ritz (University of California, Los Angeles, CA, USA)  
Ekaterina Rogaeva (University of Toronto, Canada)  
Ali Sazci (University of Kocaeli, Kocaeli, Turkey)  
Jaroslaw Slawek (Medical University of Gdansk, Poland)  
Leonidas Stefanis (University of Athens Medical School, Athens, Greece)  
Eng-King Tan (Singapore General Hospital, National Neuroscience Institute, Singapore)  
Tatsushi Toda (Osaka University Graduate School of Medicine, Osaka, Japan)  
Mathias Toft (Oslo University Hospital, Oslo, Norway)  
Christine Van Broeckhoven (University of Antwerp, Antwerp, Belgium)  
Karin Wirdefeldt (Karolinska Institute, Stockholm, Sweden)  
Dirk Voitalla (St. Josef Hospital Bochum, Dept. of Neurology, Ruhr Univ. Bochum, Germany)  
Zbigniew K. Wszolek (Mayo Clinic, Jacksonville, FL, USA)  
Alexander Zimprich (Medical University, Vienna, Austria)
